1 **Title**

2 Genome-wide association and prediction studies using a grapevine diversity panel give insights into  
3 the genetic architecture of several traits of interest

4  
5 **Authors**

6 Flutre T<sup>1,4,5</sup>, Le Cunff L<sup>2,4</sup>, Fodor A<sup>1,4</sup>, Launay A<sup>1,4</sup>, Romieu C<sup>1,4</sup>, Berger G<sup>1,4</sup>, Bertrand Y<sup>1,4</sup>, Beccavin  
7 I<sup>2</sup>, Bouckenooghe V<sup>2,4</sup>, Roques M<sup>2,4</sup>, Pinasseau L<sup>3</sup>, Verbaere A<sup>3</sup>, Sommerer N<sup>3</sup>, Cheynier V<sup>3</sup>,  
8 Bacilieri R<sup>1,4</sup>, Boursiquot JM<sup>1,4</sup>, Lacombe T<sup>1,4</sup>, Laucou V<sup>1,4</sup>, This P<sup>1,4</sup>, Péros JP<sup>1,4</sup>, Doligez A<sup>1,4</sup>

9  
10 **Addresses**

11 1 AGAP, Univ Montpellier, CIRAD, INRAE, Montpellier SupAgro, Montpellier, France

12 2 IFV, Le Grau-du-Roi, France

13 3 SPO, Univ Montpellier, INRAE, Montpellier SupAgro, Montpellier, France

14 4 UMT Géno-Vigne, Montpellier, France

15 5 Université Paris-Saclay, INRAE, CNRS, AgroParisTech, GQE - Le Moulon, 91190, Gif-sur-  
16 Yvette, France

17  
18 **Corresponding author:**

19 Flutre T, +33 (0)1 69 15 61 33, [timothee.flutre@inrae.fr](mailto:timothee.flutre@inrae.fr)

20 Doligez A, +33 (0)4 99 61 25 03, [agnes.doligez@inrae.fr](mailto:agnes.doligez@inrae.fr)

21

## 22 **Summary**

23

24 To cope with the challenges facing agriculture, speeding-up breeding programs is a worthy  
25 endeavor, especially for perennials, but requires to understand the genetic architecture of important  
26 traits. To go beyond QTL mapping in bi-parental crosses, we exploited a diverse panel of 279 *Vitis*  
27 *vinifera* L. cultivars. This panel planted in five blocks in the vineyard was phenotyped over several  
28 years for 127 traits including yield components, organic acids, aroma precursors, polyphenols, and a  
29 water stress indicator. Such an experimental design allowed us to reliably assess the genotypic  
30 values for most traits. The panel was genotyped for 60k SNPs by combining an 18K microarray and  
31 sequencing (GBS). Marker densification via GBS markedly increased the proportion of genetic  
32 variance explained by SNPs, and two multi-SNP models identified QTLs not found by a SNP-by-  
33 SNP model. This led to 489 reliable QTLs using the combined microarray-GBS SNPs for 41%  
34 more response variables than a SNP-by-SNP model applied to microarray-only SNPs, and many  
35 QTLs were new compared to the results from bi-parental crosses. Prediction accuracy ranging from  
36 0.14 to 0.84 for 80% of the response variables was promising for genomic selection, and provided  
37 insights into the genetic architecture of each trait when put in perspective with the number of QTLs  
38 and heritability.

39

## 40 **Keywords**

- 41 1. grapevine
- 42 2. genotyping-by-sequencing
- 43 3. genetic architecture
- 44 4. GWAS
- 45 5. genomic prediction
- 46 6. yield components
- 47 7. secondary metabolites
- 48 8. candidate genes

49

## 50 **Introduction**

51 Viticulture currently faces two major challenges, decreasing inputs, especially fungicide treatments,  
52 and adapting to climate change, while maintaining berry quality and differentiated wine styles. In  
53 this endeavor, both harnessing existing genetic diversity (Wolkovich *et al.*, 2018) and breeding new  
54 varieties (Adam-Blondon *et al.*, 2011) are important levers.

55 For the latter, many studies over the last two decades aimed at deciphering the genetic  
56 architecture of traits of interest by QTL mapping (Vezzulli *et al.*, *in press*). However, this approach  
57 suffers from several drawbacks: the limited allelic diversity in parents, the low number of  
58 recombination events in the progeny, the upward bias of estimated QTL effects, and the under-  
59 estimation of the polygenic contribution for prediction purposes (Cardon and Bell, 2001; Xu, 2003).  
60 As a result, all traits currently used in marker-assisted selection (Le Cunff, pers. com.; Vezzulli *et*  
61 *al.*, 2019) are controlled by a single or a few major genes, such as resistance to downy mildew and  
62 powdery mildew (DiGaspero *et al.*, 2007), black rot (Rex *et al.*, 2014), sex (Marguerit *et al.*, 2009;  
63 Picq *et al.*, 2014), berry color (Fournier-Level *et al.*, 2009), seedlessness (Mejia *et al.*, 2011), and  
64 Muscat aroma (Duchêne *et al.*, 2009; Battilana *et al.*, 2009).

65 To overcome these limits, a few genome-wide association studies (GWASs) were  
66 performed in grapevine but did not identify many new QTLs, due to various reasons. Myles *et al.*  
67 (2011), Zarouri (2016), Migicovsky *et al.* (2017) and Laucou *et al.* (2018) harnessed phenotypic  
68 data from genetic resources repositories collected without a proper experimental design. Moreover,  
69 the first three cited articles used at most 10k SNPs despite the low extent of linkage disequilibrium  
70 (Myles *et al.*, 2011; Nicolas *et al.*, 2016). Zhang *et al.* (2017) focused on a single binary trait with a  
71 major QTL, seedlessness. Yang *et al.* (2017) used only 187 SSRs and 96 genotypes. Moreover, most  
72 of these studies, as well as Zarouri (2016) which analyzed 36k SNPs in 242 cultivars, and Guo *et*  
73 *al.* (2019) which analyzed 32k SNPs in 179 cultivars, used SNP-by-SNP models to test for  
74 association.

75 However, SNP-by-SNP models do not exploit the potential gain in power of multi-SNP  
76 models (Hoggart *et al.* 2008; Zhang *et al.*, 2019). Such models indeed allow to estimate the  
77 cumulative contribution of SNPs with small effects (Yang *et al.*, 2010). They can also be extended  
78 to more realistic genetic architectures, with both sparse and dense genetic components (Zhou *et al.*,  
79 2013), the former corresponding to the case with few major genes and the latter with many small-  
80 effect QTLs. In addition, they provide a natural way to efficiently perform genomic prediction (GP;  
81 de los Campos *et al.*, 2013), even for traits with no major QTLs for which marker-assisted selection  
82 is not feasible.

83           Moreover, focusing only on searching for QTLs is prone to criticism (Rockman, 2012).  
84   When breeding is a goal, the effects of published QTLs often are overestimated (Xu, 2003) which  
85   leads to poor prediction (Meuwissen *et al.*, 2001). When a large panel of genotypes is suitable for  
86   genome-wide association studies, it hence is also relevant to use it for genomic prediction.

87           Consequently, our objective was to perform whole-genome association studies and  
88   genomic prediction analyzes for various traits of interest in grapevine breeding, likely to display  
89   different genetic architectures. We aimed at finding out to what extent genetic variation contributes  
90   to phenotypic variation, how it is organized in sparse and dense genetic components, and how  
91   accurate genomic prediction might be before using it adequately for breeding. Our approach builds  
92   on a large diversity panel of 279 *Vitis vinifera* L. cultivars (Nicolas *et al.*, 2016) defined from the  
93   French collection of genetic resources, overgrafted in the vineyard in five randomized complete  
94   blocks. The panel was phenotyped with this experimental design over several years for 127 traits  
95   including yield components, organic acids, aroma precursors, polyphenols, and a water stress  
96   indicator. The cultivars were genotyped with both microarray and sequencing after a reduction of  
97   genomic complexity (genotyping by sequencing, GBS; Barba *et al.*, 2014; Marrano *et al.*, 2017;  
98   Klein *et al.*, 2018; Guo *et al.*, 2019), reaching a total of 63k SNPs. QTL detection and genomic  
99   prediction were then performed with multi-SNP models assuming different genetic architectures.

100

## 101 **Material and methods**

102

### 103 **Plant material and field trial**

104 The panel of 279 cultivars of *Vitis vinifera* L. is weakly structured in three genetic groups, table east  
105 (TE), wine east (WE) and wine west (WW), each composed of 93 cultivars (Nicolas *et al.*, 2016).

106 In 2009, at the Domaine du Chapitre of Montpellier SupAgro (Villeneuve-lès-Maguelone, France),  
107 the 279 cultivars were over-grafted on 6-year-old vines of cultivar Marselan, itself grafted on  
108 rootstock Fercal (C. Clipet, pers. com.), in a complete randomized block design with five blocks (A  
109 to E, Fig. S1). Each of the five blocks contained one plant of each panel cultivar as well as a regular  
110 mesh of over-grafts of Marselan as control (between 23 and 39 per block). The trial was maintained  
111 under the following training system: double cordon and 3300 plants/ha (1 m between plants along  
112 the same rank and 2.5 m between plants of successive ranks).

113 A subset of 23 genotypes of a Syrah x Grenache progeny (2 parents and 21 full-sibs) was also used  
114 to assess out-of-sample genomic prediction (Adam-Blondon *et al.*, 2004; Doligez *et al.*, 2013).

115

### 116 **Phenotyping**

117 In 2010, 2011 and 2012, three clusters per plant were harvested at maturity, understood here as  
118 20°Brix, hence providing the sampling date (SAMPLDAY, in days since January 1). Were then  
119 measured the number of clusters (NBCLU), mean cluster weight (MCW, in g), mean cluster length  
120 (MCL, in cm), and cluster compactness (CLUCOMP, on the OIV 204 scale from 1 to 9; OIV, 2009).  
121 Among berries from the middle of clusters, one hundred berries were randomly sampled and  
122 weighted, providing the mean berry weight (MBW, in g). In 2011-2012 and 2012-2013 winters, the  
123 mean cluster width (MCWI, in cm), number of woody shoots (NBWS) and pruning weight (PRUW,  
124 in kg) were measured for each plant. In 2011, the veraison date (VER, in days since January 1) was  
125 also recorded. Because in 2010 it was the first fruit set after overgrafting and because pruning  
126 weight has an effect on phenotypic responses but was not measured in winter 2009-2010, raw  
127 phenotypic data from 2010 were visually explored but discarded from further analyses.

128 Two variables were computed from traits among the ten listed above: the veraison-  
129 maturity interval (VERMATU, in days), and plant vigour (VIG) as pruning weight divided by the  
130 number of woody shoots per vine (NBWS).

131 In 2011 and 2012, juices were made from the sampled berries and analyzed to measure  
132  $\delta^{13}\text{C}$  (D13C) following Gaudillère *et al.* (2001) as detailed in Pinasseau *et al.* (2017a). In 2012 were  
133 also measured glucose (GLU), fructose (FRU), malate (MAL), tartrate (TAR), shikimate (SHI) and  
134 citrate (CIT), all in  $\mu\text{Eq.L}^{-1}$ , as detailed in Rienth *et al.* (2016).

135 Six variables were computed from traits among the seven listed above: the sum of  
136 glucose and fructose (GLUFRU), glucose divided by fructose (GLUONFRU), malate divided by  
137 tartrate (MALTAR), idem for shikimate (SHIKTAR), citrate (CITAR) and the sum of glucose and  
138 fructose (GLUFRUTAR).

139 In 2014 and 2015, the same field trial was used but differently managed, with irrigation  
140 applied to blocks C, D and E only (Pinasseau *et al.*, 2017a). As above, three clusters per plant were  
141 harvested at 20°Brix, providing the mean cluster weight (MCW, in g). More details on berry  
142 sampling and processing, as well as polyphenols and  $\delta^{13}\text{C}$  measurements and analysis are in  
143 Pinasseau *et al.* (2017a), but note that only the cultivars from the panel were phenotyped (i.e., not  
144 the control). Moreover, for a given year, all sampled berries from different blocks with the same  
145 water treatment were pooled per cultivar. From the available data on the 105 polyphenols in  $\mu\text{g}$  per  
146 berry (Pinasseau *et al.*, 2017b), a few typos were corrected and the 17 extra variables defined by  
147 Pinasseau *et al.* (2017a) were calculated. In addition, two aroma precursors,  $\beta$ -damascenone  
148 (BDAM, in  $\mu\text{g.L}^{-1}$ ; Kotseridis *et al.*, 1999) and potential dimethyl sulfide (PDMS, in  $\mu\text{g.L}^{-1}$ ; Segurel  
149 *et al.*, 2005), were also measured. The volume and weight of the juice samples were recorded.

150 A total of 127 traits were phenotyped, from which 25 extra variables were computed.  
151 Because irrigation was applied to some blocks only in 2014-2015, the yield component and water  
152 stress indicator data in 2011-2012 and in 2014-2015 were analyzed separately. As a result, a total of  
153 152 response variables were subsequently analyzed.

154 The sanitary status of cultivars regarding the presence of five viruses (CNa, GLRaV1,  
155 GLRaV2, GLRaV3, GFkV) was assessed by ELISA (Clark and Adams, 1977).

156 Berry weight was phenotyped on the Syrah x Grenache cross in 2011 and 2012 in the  
157 same way as on the panel, as detailed in Doligez *et al.* (2013).

158

## 159 **Genotyping**

### 160 Data acquisition and analysis of microarray SNPs

161 The panel was genotyped as in Laucou *et al.* (2018) with the GrapeReSeq 18k Vitis microarray  
162 from Illumina which contains 18047 SNPs. Data processing (Methods S1) resulted in 13,925 SNPs  
163 for 277 cultivars. Of these, 11,102 SNPs remained with linkage disequilibrium between SNP pairs  
164 below 0.9, and 10,503 SNPs remained with minor allele frequency per SNP above 0.05.

165 The subset of 23 genotypes from the Syrah x Grenache cross was genotyped on the same  
166 microarray.

### 167 Data acquisition and analysis of sequencing SNPs

168 The panel was also genotyped by sequencing (GBS) following Elshire *et al.* (2011). Keygene N.V.  
169 owns patents and patent applications protecting its Sequence Based Genotyping technologies. Data  
170 processing (Methods S2) resulted in 184,145 SNPs with less than 30% missing data for 283  
171 accessions (the 279 cultivars from the panel as well as three others not used in this study).

#### 172 Join imputation of microarray and GBS SNPs

173 Both SNP data sets (13,925 SNPs from the microarray and 184,145 from the GBS) were combined  
174 with duplicate removal into a set of SNPs for 277 common cultivars and 197,885 SNPs using  
175 coordinates on the 12Xv2 reference sequence (Canaguier *et al.*, 2017). Missing data were imputed  
176 with Beagle version 4.1-r862 (Browning and Browning, 2009) with window=1000, overlap=450,  
177 ne=10000 and otherwise default parameters. Two final filtering steps were performed, on LD ( $\leq$   
178 0.9) resulting in 90,007 SNPs, and on MAF ( $\geq$  0.05) resulting in 63,105 SNPs. We also imputed  
179 the Syrah x Grenache SNP genotypes similarly using Beagle.

180

#### 181 **Statistical modeling of phenotypic data**

182 After an exploratory data analysis (Methods S3), each trait was then analyzed using univariate  
183 regression models. Given that the number of SNPs was higher than the number of phenotypic  
184 observations, and because of the potential presence of genotype-year interactions as well as spatial  
185 heterogeneity, the whole analysis was conducted into two phases. In the first phase (this section),  
186 estimates of total genotypic values were obtained. In the second phase (next section), these were  
187 regressed on SNP genotypes to identify QTLs, estimate their allelic effects and assess prediction  
188 accuracy.

189 For all traits, whether or not spatial correction was applied, a linear mixed model was  
190 fitted by maximum likelihood (ML) with all fixed effects from the global model (as detailed in  
191 Methods S4) as well as two random effects, for genotype and genotype-year interaction. Because R/  
192 MuMIn tests the inclusion of fixed effects only, and not random effects, R/lmerTest version 3  
193 (Kuznetsova *et al.*, 2017) was used. Explanatory variables were kept based on Fisher tests when  
194 modeled as fixed, and on likelihood ratio tests when modeled as random, with a threshold on  $p$   
195 values at 0.05 for both. The final model was then re-fitted by restricted maximum likelihood  
196 (ReML) to obtain unbiased estimates of variance components. Assumptions, such as  
197 homoscedasticity, normality, temporal and spatial independence, were checked visually by looking  
198 at residuals and empirical best linear unbiased predictors (eBLUPs) of genotypic values. Broad-  
199 sense heritability ( $H^2$ ) for phenotypic means (Nanson, 1970) was computed using both the classical  
200 formula for balanced designs using the mean number of trials (years) and replicates per trial  
201 (blocks),  $H^2_C$ , and a generalized estimator for unbalanced designs (Oahey *et al.*, 2006) ignoring



202 genotype-year interactions,  $H^2_o$ . Robust confidence intervals for variance components, heritability  
203 and genotypic coefficient of variation were obtained by parametric bootstrap as recommended by  
204 Schweiger *et al.* (2016), using the percentile method (Carpenter and Bithell, 2009) in the R/lme4  
205 and R/boot packages.

206 Empirical BLUPs of genotypic values for berry weight were obtained in the same way on the Syrah  
207 x Grenache progeny as on the panel.

208

### 209 **Statistical modeling of genotypic data**

210 Empirical BLUPs of total genotypic values were regressed on SNP genotypes via univariate  
211 models:  $eBLUP(\mathbf{g}) = f(\mathbf{M}) + \mathbf{e}$ , where  $eBLUP(\mathbf{g})$  is a vector of responses of length  $N$ ,  $\mathbf{M}$  is a matrix  
212 of  $P$  predictors, here SNP genotypes, of dimension  $N \times P$ ,  $\mathbf{e}$  is a vector of errors of length  $N$ , and  $f$  is a  
213 regression function. SNP genotypes can be encoded for additivity ( $M_a$ ) or dominance ( $M_d$ ). Only the  
214 former is displayed in the following equations, but both additive-only and additive + dominance  
215 models were tested. The regression function  $f$  encodes the genetic architecture, either sparse in  
216 which only a subset of SNPs have a non-zero effect, or dense in which all SNPs have a non-zero  
217 effect (Zhou *et al.*, 2013). As the genetic architecture is unknown, several models were tested,  
218 differing in the genetic architecture they assume or the algorithms used to fit them.

219

#### 220 Genetic architecture assumed sparse

221 When assuming a sparse architecture, we used two types of models to perform genome-wide  
222 association testing and detect QTLs. The first is the SNP-by-SNP model as implemented in  
223 GEMMA version 0.97 (Zhou and Stephens, 2012). For each SNP  $p$ ,  $eBLUP(\mathbf{g}) = \mathbf{1} \mu + M_{a,p} \beta_p + \mathbf{u} +$   
224  $\mathbf{e}$  where  $M_{a,p}$  is a vector with the genotypes at the  $p^{\text{th}}$  SNP and  $\mathbf{e} \sim N_N(\mathbf{0}, \sigma_e^2 \text{Id})$  with  $N$  the Normal  
225 distribution of dimension  $N$ ,  $\mathbf{0}$  a vector of zeros and  $\text{Id}$  the identity matrix of dimension  $N \times N$ . Our  
226 goal was to test the hypothesis of a null effect of the SNP of interest ( $\beta_p=0$ ), while controlling for  
227 relatedness between genotypes with a random effect,  $\mathbf{u}$ , having additive genetic relationships as  
228 covariance matrix. Controlling the family-wise error rate at 5% to account for multiple testing, the  
229 effects of SNPs were deemed significant when the  $p$  value from the Wald test statistic was lower  
230 than the Bonferroni threshold.

231 The second type of models jointly analyzes all SNPs. Our goal was to select a subset of  
232 SNPs with large effects while handling linkage disequilibrium. This predictor selection can be  
233 achieved in a frequentist setting *via* stepwise regression (Segura *et al.*, 2012; Bonnafous *et al.*,  
234 2018). This procedure starts with the SNP-by-SNP model, followed by inclusion, at every iteration,  
235 of the SNP with the smallest  $p$  value as an additional fixed effect, until the proportion of variance



236 explained by the polygenic effect is close to zero. The SNP effects deemed significant were those of  
237 the best model selected according to the extended BIC (Chen and Chen, 2008). We fitted it with R/  
238 mlmm.gwas v1.0.4 (Bonnafous *et al.*, 2018) allowing a maximum of 50 iterations. Predictor  
239 selection can also be achieved in a Bayesian setting via the variable selection regression model  
240 (BVSR):  $eBLUP(\mathbf{g}) = \mathbf{1} \mu + M_a \boldsymbol{\beta} + \mathbf{e}$ , with the so-called spike-and-slab prior,  $\beta_p \sim \pi_0 \delta_0 + (1 - \pi_0)$   
241  $N(0, \sigma_\beta^2)$ , where  $\delta_0$  is a point mass at zero. We fitted it with a Bayesian variational algorithm as  
242 implemented in R/varbvs version 2.5.7 (Carbonetto and Stephens, 2012). Compared to stepwise  
243 frequentist models, varbvs provides point estimates and uncertainty intervals of the proportion of  
244 SNPs with a non-zero effect,  $\pi_0$ , as well as of the “SNP heritability” (Yang *et al.*, 2010). Moreover,  
245 compared to the same Bayesian model fitted with MCMC as implemented for example in R/BGLR  
246 (Perez and Gustavo, 2014), varbvs can be faster by several orders of magnitude, especially with  
247 large numbers of predictors. SNPs were deemed significant when their posterior inclusion  
248 probability,  $PIP_p = \Pr(\beta_p \neq 0)$ , was larger than 0.80.

249

#### 250 QTL definition and annotation

251 QTLs were defined as intervals around significant SNPs based on the decay of linkage  
252 disequilibrium similarly to Bonnafous *et al.* (2018), as detailed in Methods S5. They were annotated  
253 using the genomic annotations from Canaguier *et al.* (2017). We also used the correspondence  
254 between IGGP (International Grapevine Genome Program) and NCBI RefSeq gene model  
255 identifiers provided by the URGI (<https://urgi.versailles.inra.fr/Species/Vitis/Annotations>). A  
256 comparison was performed between the QTLs detected in this study and a list of already-published  
257 QTLs (Vezzulli *et al.*, *in press*; QTLs significant at a 5% genome-wide threshold) that were  
258 classified according to the Vitis INRAE ontology v2 (Duchêne, 2020) and slightly edited for  
259 automatic processing. This comparison was made only at the chromosome level because genomic  
260 coordinates on the reference genome were difficult to retrieve from publications, and sometimes  
261 impossible especially when other Vitis species and interspecific hybrids were involved. A similar  
262 comparison was performed with significant hits from a few GWAS publications after converting  
263 their coordinates on the genome reference we used.

264

#### 265 Genetic architecture assumed dense

266 When assuming a dense architecture, the multi-SNP model is the ridge regression:  $eBLUP(\mathbf{g}) = \mathbf{1} \mu$   
267  $+ M_a \boldsymbol{\beta} + \mathbf{e}$  where  $\boldsymbol{\beta} \sim N_p(\mathbf{0}, \sigma_\beta^2 \text{Id})$ . Our first goal was to estimate the proportion of variance of  
268 empirical BLUPs of genotypic values explained by SNPs ( $PVE_{\text{SNPs}}$ ) to assess the need for additional  
269 SNPs. The classical parameterization of genotypic values in additive values and dominance

270 deviations was used with the appropriate design and covariance matrices based on SNP genotypes  
271 (VanRaden 2008, Vitezica *et al.*, 2013) so that there is an equivalence between the classical “animal  
272 model” and the ridge regression (Habier *et al.*, 2007):  $eBLUP(\mathbf{g}) = \mathbf{1}\mu + \mathbf{g}_a + \mathbf{e}$  where  $\mathbf{g}_a \sim N_N(\mathbf{0}, \sigma_a^2$   
273  $\mathbf{A})$  where  $\mathbf{A}$ , the  $N \times N$  matrix of additive genetic relationships, is proportional to the matrix product  
274  $\mathbf{M}_a \mathbf{M}_a^T$  once  $\mathbf{M}_a$  is centered using allele frequencies. We implemented this model in R/lme4 version  
275 1.1.19 (Bates *et al.*, 2015) and computed confidence intervals for variance components by bootstrap  
276 as above. When the variance component for dominance deviations was included, the algorithm  
277 often did not converge. Because the estimators of additive and dominance relationships from SNPs  
278 assume linkage equilibrium, a threshold on LD of 0.5 was applied.

279

### 280 Genomic prediction

281 The multi-SNP models, whether assuming a sparse or dense genetic architecture, also estimate SNP  
282 effects allowing out-of-sample prediction (Meuwissen *et al.*, 2001). This was assessed within the  
283 panel by K-fold cross-validation, with K set at 5 (Arlot and Lerasle, 2016), repeated 10 times, with  
284 R/caret version 6 (Kuhn, 2018), using R/varbvs for the sparse architecture and R/rrBLUP version  
285 4.5 (Endelman, 2011) for the dense architecture. We assessed prediction accuracy between  
286 empirical BLUPs of genotypic values and their predictions with a range of metrics: root mean  
287 square error (RMSE); Pearson’s linear correlation coefficient (corP) and Spearman’s rank  
288 correlation coefficient (corS); as well as outputs from the simple linear regression of observations  
289 on predictions (Pineiro *et al.*, 2008) such as the intercept, slope, adjusted coefficient of  
290 determination ( $R^2$ ) and  $p$  value of the test for no bias (Baey, 2014).

291 Out-of-sample prediction was also assessed by training rrBLUP and varbvs methods on the whole  
292 panel and predicting empirical BLUPs of genotypic values from the 23 genotypes of the Syreah x  
293 Grenache cross.

294

### 295 **Reproducibility**

296 Given the amount of resources needed to perform a genome-wide association study with a proper  
297 experimental design in a perennial plant species, we chose to implement our analyzes in such a way  
298 that it allows methods reproducibility in the sense of Goodman *et al.* (2016). Demultiplexed reads  
299 were inserted into the SRA database of the NCBI as BioProject PRJNA489354. We also made  
300 available other data and computer code on [data.inrae.fr](http://data.inrae.fr) (if not specified otherwise), as detailed in  
301 Methods S3.

302

## 303 **Results**

### 304 305 **Estimation of broad-sense heritabilities and genetic coefficients of variation**

306 All 152 analyzed response variables displayed substantial variation after conditioning on year, block  
307 and irrigation (Fig. S2). For some polyphenol variables, part of the variation was obviously  
308 associated with skin color (not shown). For the 25 response variables with data in 2011 or 2012,  
309 thanks to the control, we could assess that part of this variation is of genetic origin. For mean berry  
310 weight, a narrow distribution of control data suggested a large part of genetic variation, but a visual  
311 inspection shows that this was not the case for the other response variables (Fig. S2). We looked for  
312 spatial heterogeneity using the control regularly planted in each block. As variograms were mostly  
313 flat (Fig. S3) and prediction errors assessed by cross-validation were high (not shown), we  
314 concluded that spatial correction was not necessary. Depending on the response variable, the  
315 amount of missing data ranged from 15.78% to 43.93% (Table S2). To account for such unbalance  
316 when controlling for known confounders, we fitted linear mixed models and obtained the BLUPs of  
317 the genotypic values. After model selection, the final set of fixed and random effects differed  
318 between response variables (Table S2).

319 As shown in Figure 1, 76.6% of the broad-sense heritabilities ( $H^2$ ) were above 0.5  
320 (arbitrarily chosen here as a quality threshold), with narrow confidence intervals (Table S2). Two  
321 different estimators,  $H^2_c$  and  $H^2_o$ , handling missing data differently, gave very similar estimates  
322 (Table S2). This measure of experiment accuracy indicated that, for most response variables, the  
323 phenotypic data of a given cultivar provided a high degree of agreement with the genotypic value of  
324 this cultivar. Moreover, 92.7% of the genetic coefficients of variation are above 5% and 59.1%  
325 above 20% (Figure 1, Table S2).

326  
327 **Fig. 1** Estimation in a diverse panel of *Vitis vinifera* L. of (A) broad-sense heritabilities for 152  
328 response variables using the estimator from Oakey *et al.* (2006),  $H^2_o$ , and (B) their genetic  
329 coefficients of variation,  $CV_g$ . Vertical lines indicate the median (plain), and quantiles at 0.25 and  
330 0.75 (dotted).

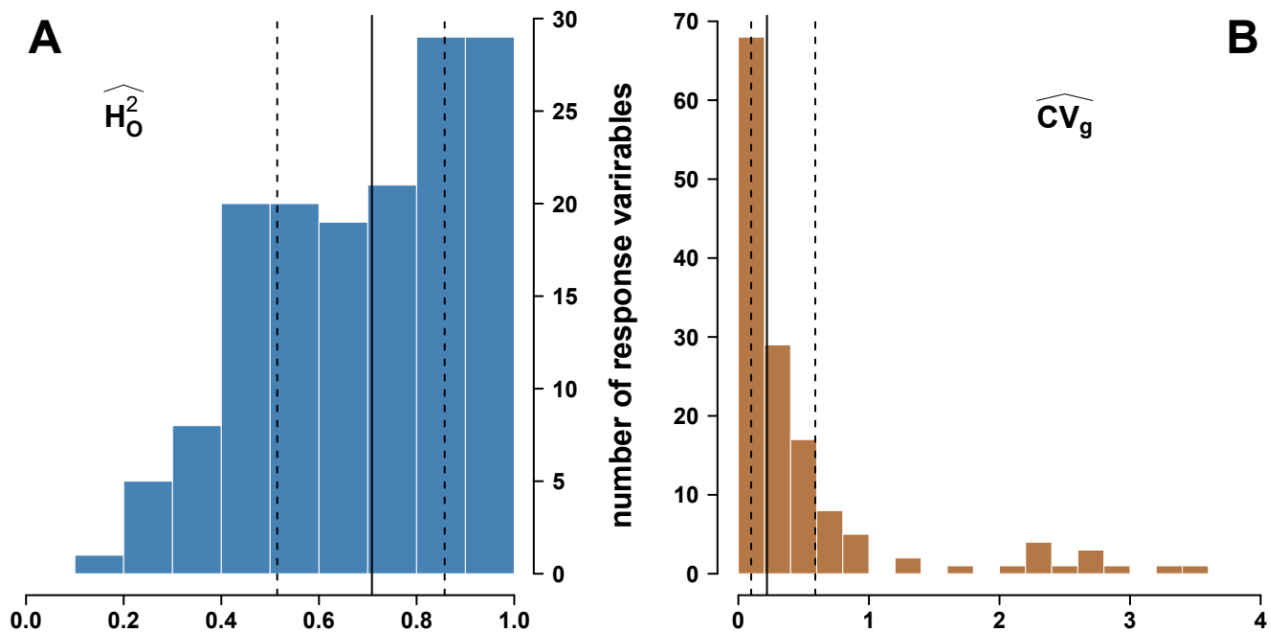

### 332 Combining genotyping technologies to explain more genetic variance

333 Once we obtained the genotypic BLUPs of all cultivars for each response variable, we aimed at  
334 explaining their variance with SNP genotypes. For that purpose, we used two sets of SNPs,  
335 hereafter referred to as “microarray-only SNPs” and “microarray-GBS SNPs”, obtained as follows.

336 Nicolas *et al.* (2016) originally defined the population membership of each cultivar with  
337 20 SSRs using STRUCTURE (Pritchard *et al.* 2000, Falush *et al.* 2003). We did here a DAPC using  
338 8840 microarray SNPs without any missing data. This confirmed the genetic structure in three  
339 weakly differentiated clusters, called “population” hereafter. When performing a PCA, the first  
340 principal component accounted for 8.1% of the total variance, and the second one for 2.8% (Fig.  
341 S4). Moreover, results from SNPs revealed a change in population membership for nine cultivars  
342 (Fig. S4 and Table S3), most probably due to a better genome coverage. Most SNPs had moderate  
343 allele frequencies, and cultivars from the Wine West population had a deficit of low-frequency  
344 SNPs (Fig. S5), in agreement with the ascertainment bias typical of microarray-based high-  
345 throughput genotyping (Albrechtsen *et al.*, 2010). Only cultivars from the Table East population  
346 showed a slight excess of low-frequency SNPs. After filtering on LD below 0.9 and MAF below  
347 0.5, 10,503 SNPs remained, which formed the first set of SNPs (“microarray-only SNPs”) to be  
348 used in GWAS and genomic prediction.

349 Because LD is known to be short in *Vitis vinifera* L. (Myles *et al.*, 2011; Nicolas *et al.*,  
350 2016), we increased the SNP density by sequencing with complexity reduction (GBS) using the  
351 *ApeKI* restriction enzyme. Raw reads had high quality along their sequences, although many  
352 displayed adapter content at their 5' end, which had to be trimmed off. After demultiplexing, more

353 than 95% of the reads were assigned to a cultivar. After alignment on the reference genome, the  
354 depth of coverage (Molnar and Ilie, 2015) of regions having at least one read, averaged over  
355 cultivars, ranged from a minimum of 2.3 reads to a maximum of 81.2 with a median at 21.7. This  
356 indicated a reasonable chance of properly calling both homozygous and heterozygous SNPs. After  
357 filtering out SNPs with calling quality below 20 and supported by less than 10 reads, and setting as  
358 missing SNP genotypes with more than 30% missing data, 184,145 SNPs remained.

359 We combined microarray SNPs with GBS SNPs, reaching a total of 197,885 SNPs for  
360 277 cultivars in common. Missing data were imputed using LD with Beagle as advised by Swarts *et*  
361 *al.* (2014) for highly heterozygous samples with unknown segregating parental haplotypes. After  
362 filtering SNPs on LD above 0.9, 90,007 SNPs remained. The distributions of allele frequencies  
363 were similar in the three populations (Fig. S5). Moreover, as expected from sequencing compared to  
364 microarrays, they showed an excess of low-frequency SNPs. After filtering on MAF below 0.05, we  
365 used the combined data set of 63,105 SNPs (“microarray-GBS SNPs”) for GWAS and genomic  
366 prediction.

367 Most importantly, compared to the microarray-only SNP set, the combined microarray-  
368 GBS set displayed a substantially higher SNP density along all chromosomes (Fig. S6). We hence  
369 computed the proportion of variance in genotypic BLUPs explained by SNPs ( $PVE_{SNPs}$ ). For this,  
370 we estimated the genetic relationships between cultivars (Fig. S7). When assuming an additive-only,  
371 polygenic architecture, for the vast majority of responses variables (97.8%),  $PVE_{SNPs}$  was higher  
372 with microarray-GBS SNPs than with microarray-only SNPs (Fig. 2, Table S4). This clearly  
373 showed the advantage of combining SNPs to increase the likelihood that the QTLs are in LD with at  
374 least one genotyped SNP.

375  
376 **Fig. 2** Estimation in a diverse panel of *Vitis vinifera* L. of the proportion of variance in genotypic  
377 BLUPs explained by SNPs for 152 response variables and two SNP densities, assuming an additive-  
378 only, polygenic architecture.

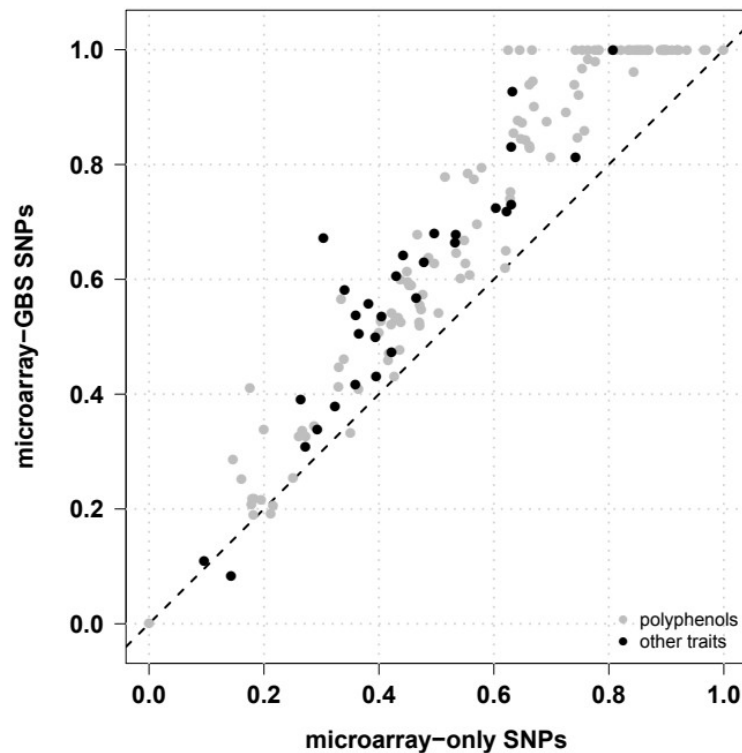

380

381 Models including both additive and dominance relationships converged with difficulty.  
382 Moreover, the proportion of variance of genotypic BLUPs explained by microarray-GBS SNPs when  
383 both additive and dominance relationships were included was always equal or lower than with only  
384 additive relationships (Table S4). The matrix of dominance relationships was very similar to the  
385 identity matrix, making it virtually indistinguishable from the error term (Fig. S7). The genetic  
386 variance component of dominance and the error variance hence were unidentifiable.

387

### 388 **QTL detection by GWAS and identification of candidate genes**

389 First, each of the 152 response variable was separately analyzed with a SNP-by-SNP model fitted  
390 using GEMMA. With the microarray-only SNPs, we detected a total of 2,295 significant SNPs for  
391 88 response variables and, with the microarray-GBS SNPs, 7,855 significant SNPs for 101 response  
392 variables (Table 1 and Table S5). For each response variable, because SNPs can be in LD with each  
393 other, we defined an interval around each significant SNP using the 95% quantile of kinship-  
394 corrected LD between random SNP pairs and the distance in bp predicted for this threshold. In the  
395 following, each such interval is called a QTL. Using the microarray-GBS data set, 2.8 million SNP  
396 pairs gave a LD threshold of 0.056 corresponding to a 50-kb distance (Fig. S8). The QTL around  
397 each significant SNP hence consisted in a physical interval of 100 kb. After merging the

398 overlapping QTLs per response variable, the SNP-by-SNP model identified a total of 1,179 QTLs  
 399 with the microarray-only SNPs and 1,784 QTLs with the microarray-GBS SNPs (Tables 1 and S6).

400 Then, to benefit from a potential gain in power when detecting significant SNPs and  
 401 accuracy when estimating their effects, we fitted two multi-SNP models, using mlmm.gwas and  
 402 varbvs. With the microarray-only SNPs, mlmm.gwas detected a total of 1,257 significant SNPs  
 403 corresponding to 1,243 QTLs for 148 response variables and, with the microarray-GBS SNPs, 703  
 404 significant SNPs corresponding to 692 QTLs for 125 response variables (Tables 1, S5 and S6). With  
 405 the microarray-only SNPs, varbvs detected a total of 266 significant SNPs corresponding to 257  
 406 QTLs for 118 response variables and, with the microarray-GBS SNPs, 258 significant SNPs  
 407 corresponding to 257 QTLs for 119 response variables (Tables 1, S5 and S6).

408  
 409 **Table 1** Comparison between methods in terms of the number of QTLs (#QTLs) identified in a  
 410 diverse panel of *Vitis vinifera* L. for two SNP data sets, summed up over all response variables. Also  
 411 indicated are the number of response variables with at least one QTL (#RVs), and the number of  
 412 significant SNPs (#sSNPs).

| Method     |           | microarray-only SNPs | microarray-GBS SNPs  |
|------------|-----------|----------------------|----------------------|
| Model      | Software  | #RVs: #sSNPs ; #QTLs | #RVs: #sSNPs ; #QTLs |
| SNP-by-SNP | GEMMA     | 88: 2,295 ; 1,179    | 101: 7,855 ; 1,784   |
| multi-SNP  | mlmm.gwas | 148 : 1,257 ; 1,243  | 125: 703 ; 692       |
|            | varbvs    | 118: 266 ; 257       | 119: 258 ; 257       |

413  
 414 For both SNP data sets, the number of response variables with at least one QTL was  
 415 higher with the multi-SNP methods than with the SNP-by-SNP method, confirming the gain in  
 416 power obtained with multi-SNP models. Within multi-SNP methods, mlmm.gwas found more  
 417 significant SNPs and QTLs than varbvs, and for more response variables. Yet, the interpretation is  
 418 not straightforward as, notably, these methods do not use the same criterion for declaring a SNP as  
 419 significant (see Discussion). Surprisingly, for both multi-SNP methods, the number of response  
 420 variables with at least one QTL was lower with more tested SNPs, as well as the numbers of  
 421 significant SNPs and QTLs.

422 We merged all QTLs per response variable over both SNP sets and all three methods.  
 423 This yielded a total of 3,490 QTLs over 150 response variables (Table S7), which corresponded to  
 424 an increase of 196% in the number of QTLs and of 70% in the number of response variables with at  
 425 least one QTL, compared to applying the SNP-by-SNP method on the microarray-only SNPs. Over



426 the 3,490 QTLs, 136 were found by all three methods, while 3,001 were found by a single method  
427 only and 1,598 by multi-SNP methods only (Fig. S9). Response variables with at least one QTL had  
428 a median number of QTLs of 23 and a maximum of 68. Furthermore, over these 150 response  
429 variables, 26 had no QTL according to the SNP-by-SNP method but at least one found by both  
430 multi-SNP methods (Fig. S10).

431 In terms of genomic distribution, all chromosomes harbored at least one QTL (Fig. S11),  
432 and most QTLs found only by the multi-SNP mlmm.gwas method fell far from QTLs found by  
433 other methods (Fig. S12). Moreover, 90% QTLs found only by the SNP-by-SNP method GEMMA  
434 clustered on chromosome 2 for 80 response variables (all of them but three being polyphenols, in  
435 relation with the anthocyanin-related MYB genes on this chromosome, Matus *et al.*, 2008). This  
436 illustrates the fact that such a method reports all significant SNPs whatever the LD pattern between  
437 them (Fig. S12). In contrast, the multi-SNP varbvs method was more parsimonious, yet had enough  
438 power to identify significant SNPs in regions in which GEMMA did not identify any signal.

439 In an attempt to identify a reduced set of QTLs with high priority for further  
440 investigation, 489 QTLs involving 124 response variables were deemed the most reliable as they  
441 were found by at least two methods (Table S7). They corresponded to 59% less QTLs but 41%  
442 more response variables with at least one QTL, compared to applying the SNP-by-SNP method on  
443 the microarray-only SNPs. All chromosomes harbored at least one such reliable QTL, except  
444 chromosome 19 (Fig. 3). The reliable QTL lengths ranged from 100,001 bp to 1,072,169 bp, with a  
445 median at 145,089 bp.

446

447 **Fig. 3** Genomic distribution of the most reliable QTLs identified by two methods in a diverse panel  
448 of *Vitis vinifera* L. after merging them over microarray-only and microarray+GBS SNP sets per  
449 response variable. The color legend indicates the number of methods that identified a given QTL.

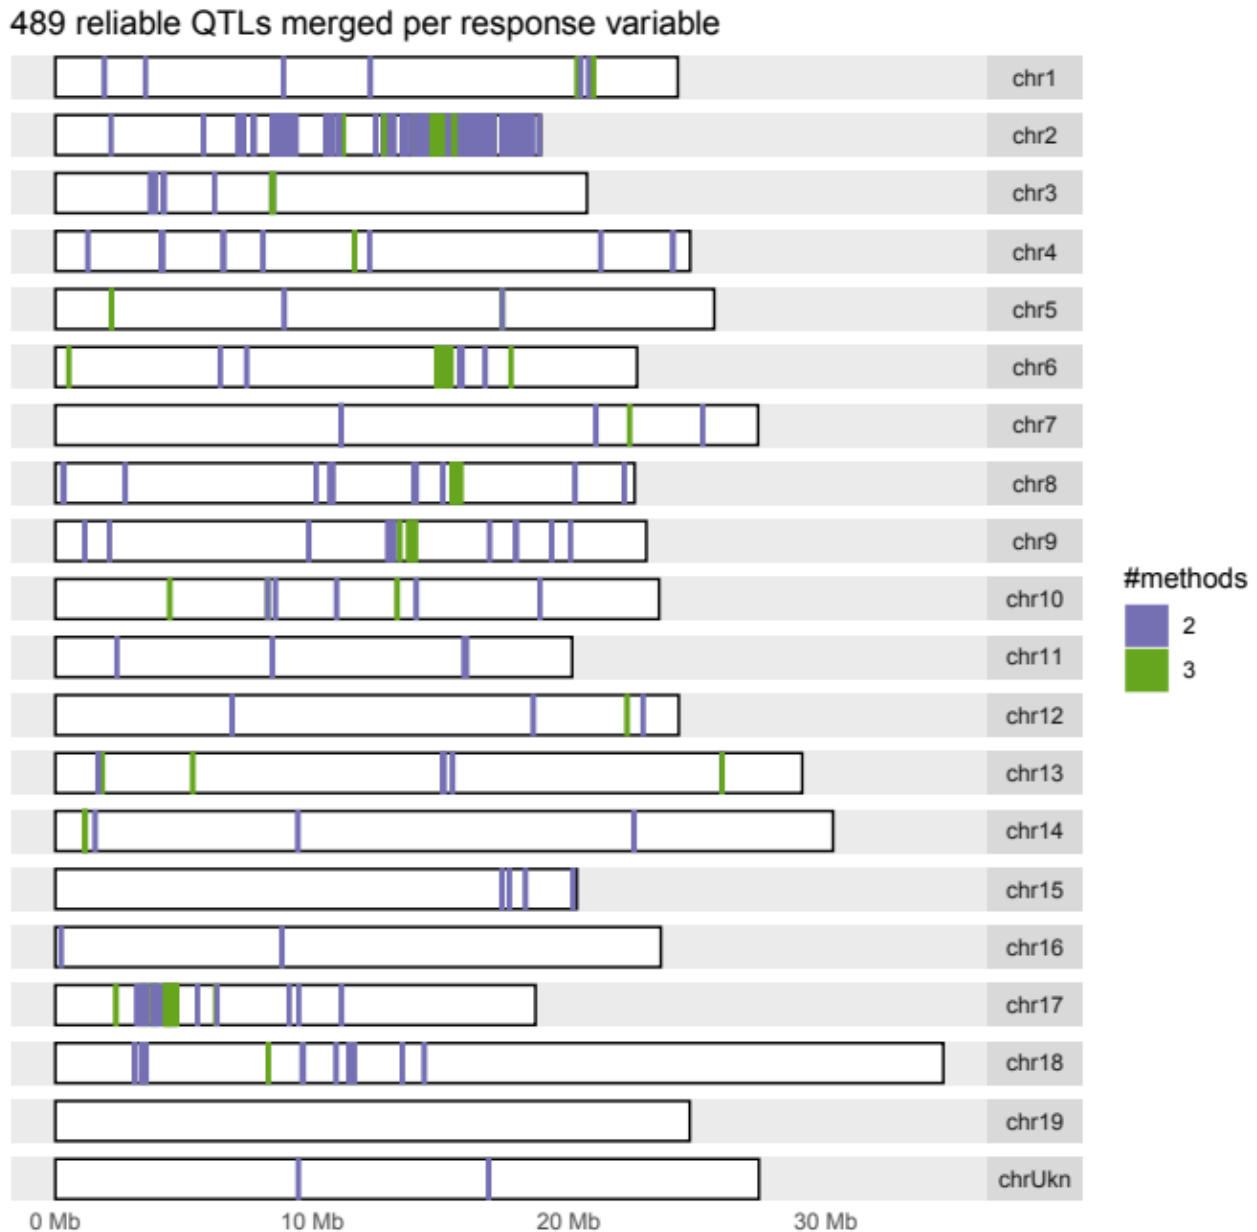

451 The 489 most reliable QTLs were compared with the largest list of QTLs detected in bi-  
452 parental crosses of grapevine compiled so far (Vezzulli *et al.*, *in press*). This list synthesizes  
453 information about 535 main QTLs from 78 publications ranging from 2002 to 2019 involving 55  
454 crosses (17 intraspecific, 37 interspecific and one unknown). It concerns a total of 102 traits (more  
455 or less specific, e.g., all anthocyanins are grouped together) from seven classes specified as in the  
456 *Vitis* INRAE ontology. Among the 149 traits analyzed in our study, 128 were deemed absent from

457 the list of published QTLs, for which we found 448 reliable QTLs, and 21 deemed present,  
458 accounting for the 41 other reliable QTLs, as listed in Table S8. For these 21 traits in common,  
459 QTLs on the same chromosome were found only for six traits (Table S7): cluster number (on  
460 chromosome 7), berry weight (on chromosomes 1, 2, 8, 11, 15 and 17), malate (on chromosomes 9  
461 and 18), and (un)methylated anthocyanins (on chromosome 2), glucose to fructose ratio (on  
462 chromosome 2). Therefore, when summing up at the QTL level over all response variables, among  
463 our 489 reliable QTLs, only 4.7% were on the same chromosome as published main QTLs.

464 We also compared our reliable QTLs with significant GWAS hits from other publications  
465 in grapevine. Only two traits (cluster and berry weights) were phenotyped in at least one other study  
466 and for which at least one significant GWAS hit was found (Zarouri, 2016; Laucou *et al.*, 2018; Guo  
467 *et al.*, 2019). For berry weight, out of the 10 QTLs we found, 8 were deemed new on chromosomes  
468 1, 2, 8, 11, 15 and 17. We also found two QTLs on chromosome 8 close to a GWAS hits from  
469 Zarouri (2016), but did not recover other GWAS hits from Zarouri (2016) on chromosomes 5 and  
470 17, and from Guo *et al.* (2019) on chromosomes 17, 18 and 19. For cluster weight, we found two  
471 new QTLs on chromosomes 1 and 3 but did not recover the GWAS hits from the other studies, on  
472 chromosomes 5 (Zarouri, 2016) and 13 (Laucou *et al.*, 2018).

473 A drawback of QTL detection is its focus on statistical significance, a dichotomization of  
474 evidence known to have several limitations (McShane and Gal, 2018). It is usually recommended  
475 to, at least, also check and provide effect estimations (Gardner and Altman, 1986). All estimates of  
476 significant additive SNP effects are hence given in supplementary (Table S5), along with a  
477 quantification of their uncertainty. For each of the 489 reliable QTLs, we also provide a boxplot per  
478 genotypic class for one of the significant SNP, arbitrarily chosen among those associated with the  
479 QTL (Fig. S13).

480 To help highlighting candidate genes, we compared the reliable QTLs with the reference  
481 genomic annotations gathering 42,413 gene models. As the same locus can be a QTL for multiple  
482 response variables, we first merged the 489 QTLs across all response variables, which resulted in  
483 134 distinct genomic intervals (Table S9). These intervals had a median length of 100,001 kb (with  
484 a minimum of 100,001 kb and a maximum of 1,072,169 kb). The comparison with gene models  
485 yielded 1928 hits with 1926 distinct gene models (Table S10). The median number of overlaps per  
486 interval was 11, with a minimum of 2 and a maximum of 87. Among the 1926 gene models, 1313  
487 had a NCBI RefSeq identifiers. Out of these, 333 were annotated as “uncharacterized locus” and  
488 hence 980 had an annotations among 863 distinct ones (Table S11).

489 As shown on Fig. S11 and S12, a large portion of chromosome 2 (between 12 Mb until  
490 the end at 18 Mb) displays a high density of QTLs due to the large number of response variables  
491 linked to polyphenols.

492

### 493 **Assessment of genomic prediction and insight into genetic architectures**

494 As a first step, we assessed the accuracy of genomic prediction within the panel of 279 cultivars,  
495 using repeated  $K$ -fold cross-validation. Two methods were compared, the first one assuming a  
496 sparse genetic architecture, with R/varbvs as its GWAS results (above) showed how parsimonious  
497 yet powerful it was, and the second one assuming a dense genetic architecture, with R/rrBLUP  
498 implementing the ridge regression corresponding to the infinitesimal model as a baseline. Note that  
499 the QTL results from the GWAS section were not used when training each model, to avoid  
500 overfitting. Then, for each test set of the cross-validation, various metrics were computed to  
501 compare the genotypic BLUPs obtained from phenotypic data only and the predictions obtained  
502 from additive SNP effects only (Table S12).

503

504 **Fig. 4** Assessment of genomic prediction accuracy within a diverse panel of *Vitis vinifera* L. with  
505 microarray-only and microarray-GBS SNPs for 152 responses variables by repeated  $K$ -fold cross-  
506 validations. The four metrics were averaged over folds and replicates.

507

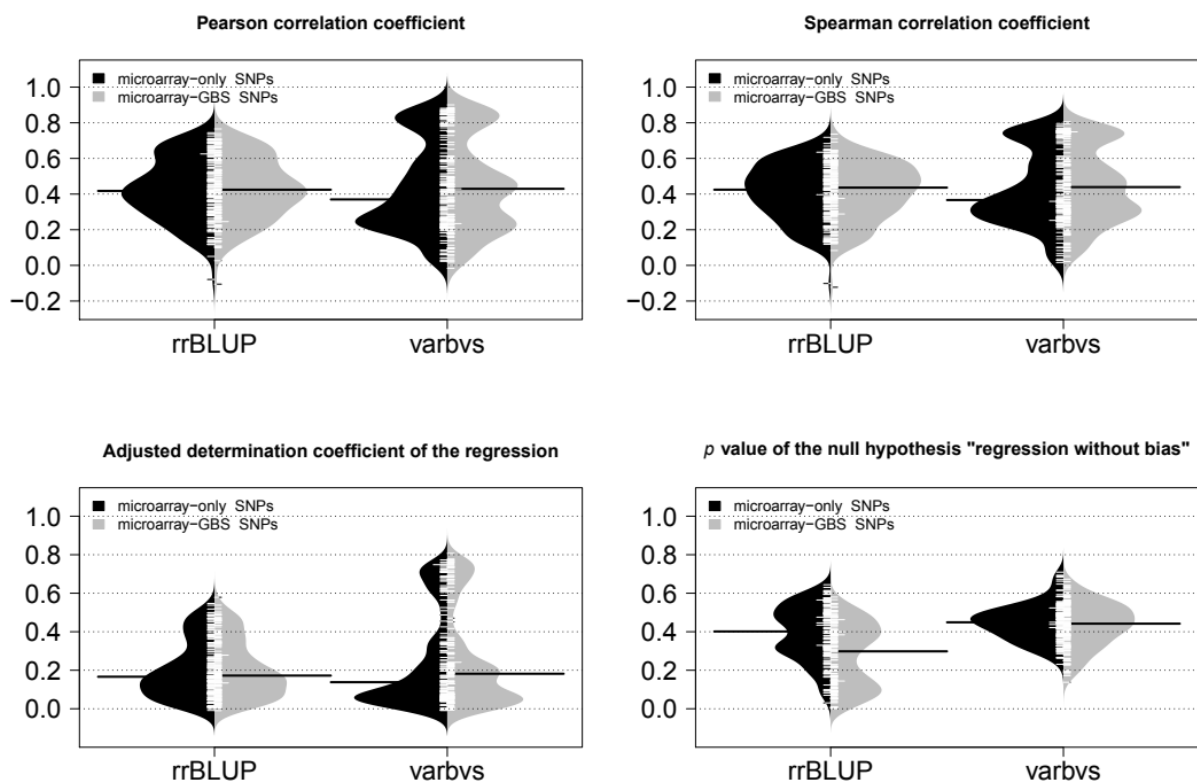

508 As shown in figure 4, the median Pearson and Spearman correlation coefficients fell  
509 between 0.37 and 0.44, with 80% of the whole distributions ranging between 0.14 and 0.84.  
510 Comparisons between these correlation coefficients and the broad-sense heritability of each  
511 response variable showed a substantial correlation (Fig. S14), higher for varbvs (~0.65) than for  
512 rrBLUP (~0.54). For both methods, most Spearman coefficients from the genomic prediction are  
513 lower than the broad-sense heritabilities. This was expected since the genomic prediction models  
514 we tested only exploited additive genetic variance. But note that low values of Spearman  
515 coefficients (below 0.2), and a few negative ones, occurred for traits with medium broad-sense  
516 heritabilities (between 0.4 and 0.7). Based on figure 4, both methods had similar median correlation  
517 coefficients. However, the distributions of rrBLUP's correlation coefficients were roughly uni-  
518 modal whereas varbvs' clearly were multi-modal. This confirmed what was known from  
519 simulations (e.g., Wang *et al.*, 2015), that rrBLUP's assumption of an infinitesimal architecture is  
520 fairly robust compared to varbvs' assumption of a sparse architecture, yet varbvs can provide  
521 substantially better predictions than rrBLUP for some traits. Moreover, rrBLUP results did not seem  
522 to depend on the SNP set whereas, for varbvs, results were slightly better with the microarray-GBS  
523 SNPs. This suggests that, among the extra SNPs provided by GBS, varbvs managed to identify  
524 those which improved its predictions. When looking at the determination coefficient, the median for  
525 rrBLUP (0.17) also did not depend on the SNP sets and both distributions looked fairly similar. In  
526 contrast, the median for varbvs increased from 0.14 with microarray-only SNPs to 0.18 with  
527 microarray-GBS SNPs. The 0.80 quantile for rrBLUP was around 0.44 whereas for varbvs it was  
528 around 0.70. Moreover, concerning the  $p$  value of the test for no bias, varbvs showed similar values  
529 across both SNP sets, higher than rrBLUP in general and above 0.05, suggesting an absence of bias.  
530 On the contrary, rrBLUP with the microarray-GBS SNPs showed lower  $p$  values compare to with  
531 the microarray-only SNPs. This suggests that the constraint from the infinitesimal model behind  
532 rrBLUP to estimate all SNP effects to be non-zero may be too far from the real genetic architecture,  
533 especially when SNP density is high.

534 As a second step, we assessed the accuracy of genomic prediction using the panel of 279  
535 cultivars as a training set to predict mean berry weight in a subset of a Syrah x Grenache progeny.  
536 With rrBLUP (respectively varbvs), this gave a Pearson correlation of 0.56 (0.35) and Spearman  
537 correlation of 0.54 (0.26), an adjusted coefficient of regression of 0.28 (0.08), and a  $p$  value when  
538 testing for no bias of  $1.6 \times 10^{-4}$  ( $3.5 \times 10^{-3}$ ). These values are promising, even though the adjusted  
539 coefficient of regression is rather weak, and predictions are biased. Moreover, rrBLUP gave better  
540 correlations than varbvs, which was in agreement with the results obtained by cross-validation  
541 within the panel (Pearson correlation of 0.71 with rrBLUP and 0.61 with varbvs).

542 Finally, combining results from both QTL and genomic prediction can provide insight  
543 into the genetic architecture of the studied traits. As shown in Figure 5 (made from data in  
544 TableS13), the more reliable QTLs a response variable had, the more accurately varbvs predicted  
545 the BLUPs of its genotypic values compared to rrBLUP, which would suggest that these traits have  
546 a sparse architecture. In contrast, rrBLUP predicted better than varbvs the response variables for  
547 which less than 6 QTLs were detected, and notably the case where at most 1 QTL was found,  
548 suggesting here a dense architecture for these traits. Yet, coloring points with respect to broad-sense  
549 heritability shows that response variables for which varbvs predicted better than rrBLUP seemed to  
550 have not only more reliable QTLs but also a higher broad-sense heritability.  
551

552 **Fig. 5** Interplay between the number of QTLs deemed reliable, the difference in prediction accuracy  
553 between methods, and broad-sense heritability, using 152 response variables phenotyped on a  
554 diverse panel of *Vitis vinifera* L. Prediction accuracy corresponds to the Spearman correlation  
555 coefficient averaged over cross-validation folds and replicates when using the microarray-GBS SNP  
556 set. Broad-sense heritability was estimated based on Oakey *et al.* (2006).

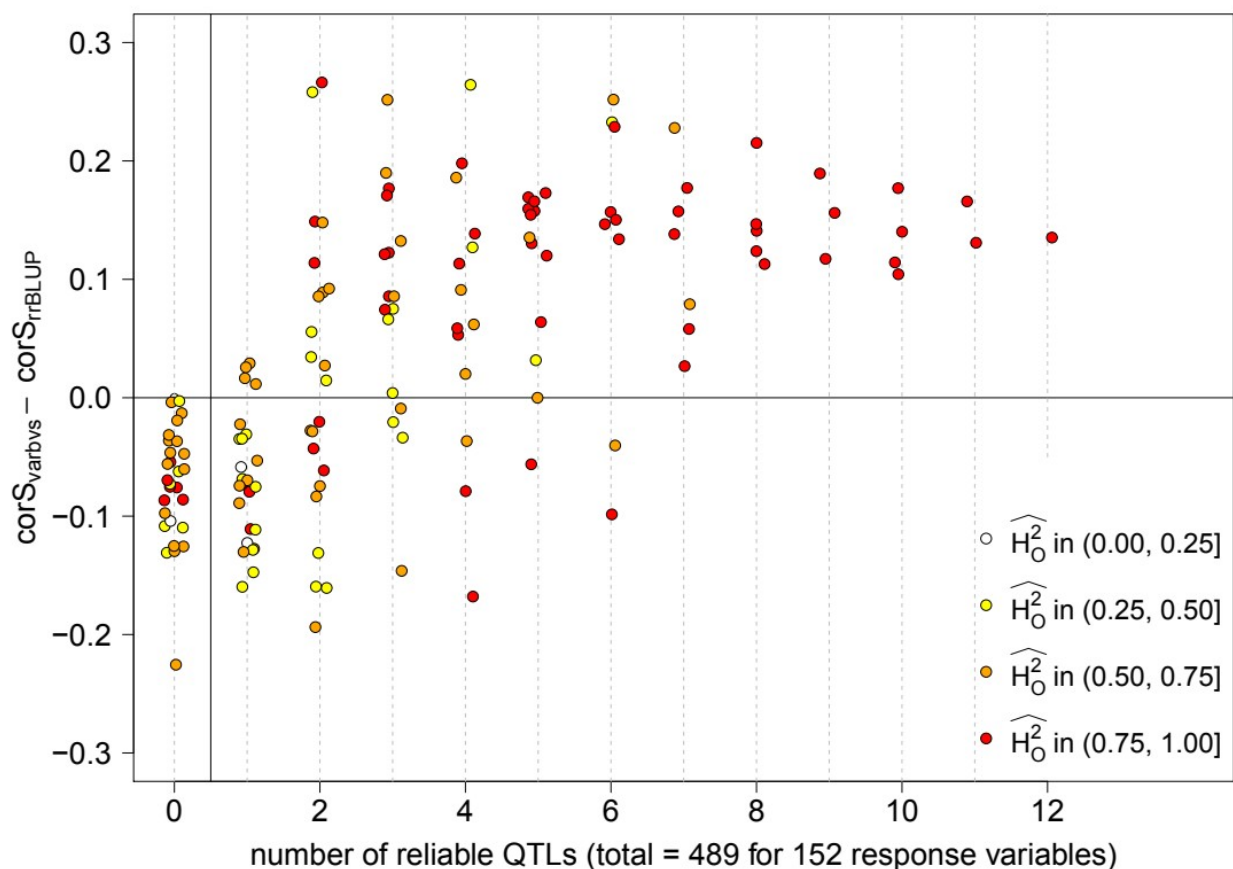

## 558 **Discussion**

559

560 For most traits, high genetic coefficient of variation ( $CV_g$ ) indicated a substantial amount of genetic  
561 variation around the mean value, which suggested promising opportunities for selection. It hence  
562 motivated the detection of QTLs and the estimation of their effects, as done in GWAS, and the  
563 prediction of breeding values, as done in genomic selection, which are two sides of the same coin.  
564 Indeed, both gain from deciphering the genetic architecture of traits of interest. In this challenge,  
565 three key components are interlinked, phenotypic data, genotyping data and statistical models, all  
566 three of which requiring us to choose between alternatives with trade-offs. We discuss ours in the  
567 following and suggest avenues of improvement, of interest to perennial crops in general and  
568 grapevine in particular.

569

## 570 **Design and analysis of the field trial**

571 Acquiring phenotypic data from which genotypic values can be deduced with sufficient accuracy is  
572 a big challenge, especially because a large panel is a prerequisite to have enough power to detect  
573 QTLs (Nicolas *et al.*, 2016). Our randomized block design certainly helped in reaching high broad-  
574 sense heritabilities for certain traits, yet others show lower ones (see also the sometimes large  
575 variation among controls in Fig. S2). Some classical, by-hand phenotyping procedures, when  
576 performed on a large panel in the field, are very time-consuming, requiring the coordination of  
577 enough manpower in an error-prone process. This calls for the implementation, testing and  
578 deployment of high-throughput methods in complement or replacement (Fiorani and Schurr, 2013;  
579 Kicherer *et al.*, 2017). But different strategies need to be assessed, notably in terms of investment  
580 (Reynolds *et al.*, 2019). Another, major challenge consists in sampling items, such as fruits, at a  
581 similar physiological stage, otherwise leading to unknown confounders impossible to control within  
582 the statistical model. This is a particularly pressing issue for grapevine due to the strong intra- and  
583 inter-cluster heterogeneity between berries (Shahood, 2017). New protocols were proposed,  
584 requiring temporal sampling, but work remains to be done to automatize them allowing the  
585 phenotyping of a large number of genotypes (Bigard *et al.*, 2018).

586 In terms of statistical modeling, we chose a two-stage procedure for ease of analysis  
587 (Möhring and Piepho, 2009). To comply with the assumptions of the linear mixed model used in the  
588 first stage, we had to transform the raw phenotypic data for several traits based on visual  
589 assessment. An alternative could have been to apply a more statistically-motivated transformation  
590 (Box and Cox, 1964; Burbidge *et al.*, 1988), but these ones apply only to linear models, *i.e.*, without  
591 random effects. An avenue of improvement would be to try extensions of the Box-Cox family of



592 transformation to linear mixed model (Gurka *et al.*, 2006), and assess how well they perform model  
593 selection. Another, major decision was what to include as explanatory factors in the full model  
594 before model selection. We chose to include pruning weight, the number of wooding shoots and  
595 vigour, but neither flower sex nor berry color. Our rationale was that the former three are mainly  
596 influenced by location as well as the way the field trial is conducted, whereas the latter two are fully  
597 determined genetically, even though flower sex can be converted by manipulation (Negi and Olmo,  
598 1966). We assumed that excluding those strongly genetically-determined from the explanatory  
599 factors at the first stage of the analysis would allow to keep most genetically-based variation  
600 between genotypes for the second stage of the analysis (GWAS and genomic prediction). Another  
601 direction for future work would be to exploit the correlations between traits by using multivariate  
602 models (Mardia *et al.*, 1979). Indeed, Pearson correlation coefficients between the BLUPs of  
603 response variables showed some patterns (Table S14 and Fig. S15). A comparison of univariate and  
604 multivariate linear models could be done at the first stage of the analysis, and SNP-by-SNP versus  
605 multi-SNP multivariate models could also be performed at the second stage, both comparisons  
606 being the subject of a future article. A more ambitious approach would be to analyze several traits  
607 jointly guided by process-based models such as functional-structural plant models (Sievanen *et al.*,  
608 2014), be they at the organ or plant level (Génard *et al.*, 2010; Pallas *et al.*, 2009). This would allow  
609 the investigation of genotype-environment interactions, but would notably require the phenotyping  
610 of all key phenological stages.

611

### 612 **Increase of genotyping density**

613 When genotyping a sample to perform a GWAS, one aims at having a marker density so that each  
614 causal locus has a high probability of being in strong enough LD with at least one marker  
615 (Kruglyak, 1999). The specific number of required markers depends on the evolutionary process of  
616 the sample under study, but in grapevine half a million SNPs may be the minimum (Nicolas *et al.*,  
617 2016; Myles *et al.*, 2009). Reaching such numbers would require whole-genome sequencing. The  
618 cost of fully sequencing this panel of 279 genotypes may still be too high for some time. In  
619 addition, even though the sequencing techniques keep improving (Jung *et al.*, 2019), highly  
620 heterozygous genomes require the complex assembly of genomic fragments. As an intermediate  
621 step, genotyping by sequencing the same genotypes as we did here but with another restriction  
622 enzyme could increase the final SNP density as long as sequenced locus are different enough  
623 between enzymes, which can be explored *in silico* (<https://github.com/timflutre/insilicut>).

624 Imputation of heterozygous genotypes from GBS data such as ours is notoriously  
625 difficult (Swarts *et al.*, 2014). Moreover the large amount of missing data makes it difficult to

626 properly assess imputation accuracy similarly to the cases where dense reference haplotypes are  
627 available (Marchini and Howie, 2010). To validate our microarray-GBS set in a way that is linked  
628 to our main interest, the association between genotypic and phenotypic data, we looked at the  
629 proportion of variance in BLUPs of genotypic values explained by SNP genotypes ( $PVE_{SNPs}$ ). The  
630 improvement when going from the microarray-only set to the microarray-GBS set increased our  
631 degree of trust in the genotyping and imputation procedures. Yet,  $PVE_{SNPs}$  did not equal 1 for all  
632 response variables. Many factors can underly this discrepancy. First, empirical BLUPs of genotypic  
633 values are not fully accurate versions of the “true” genotypic values, as reflected in the distribution  
634 of broad-sense heritabilities already discussed above. Second, the microarray-GBS set may not tag  
635 the core genome of the panel well enough, with a SNP density being too low and pan-genome  
636 structural variations remaining undetected, an issue which would be fixed by whole-genome  
637 sequencing (Marroni *et al.*, 2014). Third, the assumptions of our linear mixed model may be unmet  
638 in the data. Even if the additive relationships we included are supposed to capture the effect of  
639 genetic structure (Aistle and Balding, 2009) and that models we tested including dominance  
640 relationships did not converge, alternative models could be tested, notably those robust to outliers  
641 (Gianola *et al.*, 2018) or those capturing nonlinear allelic effects (Jacquin *et al.*, 2016).

642

### 643 **Sensitivity and specificity of QTL detection, and candidate genes**

644 We have endeavored to compare three methods of genome-wide association studies, using them as  
645 most practitioners do in practice. But unfortunately such a comparison effort quickly reaches its  
646 limits. Indeed, most practitioners use such methods in a hypothesis testing context to identify a set  
647 of significant SNPs, hence dichotomizing evidence in the data. Because the methods minimize  
648 different criteria (family-wise error rate, false discover rate) and handle the multiple testing issue in  
649 different ways (SNP-by-SNP testing followed by a  $p$  values correction, or joint multi-SNP  
650 selection), a SNP can be declared significant by one method and not by another, even though it is  
651 slightly above the threshold of the former and slightly below the threshold of the latter. Another,  
652 major misleading factor when comparing GWAS methods is linkage disequilibrium. Comparing  
653 SNP-by-SNP and multi-SNP methods in terms of the total number of significant SNPs is not as  
654 relevant as it seems as SNP-by-SNP methods do not take LD into account. Moreover, two different  
655 multi-SNP methods can select two different, yet linked SNPs for arbitrary reasons, such as the  
656 initial order of these SNPs as given to the software implementing the method. That is why the  
657 number of significant SNPs reported per method varies widely. The very high number from the  
658 SNP-by-SNP method does notably not indicate a better power compare to the multi-SNP methods.  
659 When performing a GWAS, it helps keeping in mind that, given the dimension of the data set ( $n$

660 genotypes and  $p$  SNPs), hypothesis testing becomes hopeless when the number,  $k$ , of truly  
661 associated SNPs is such that  $k(1+\log(p/k))$  is large compare to  $n$  (Verzelen, 2012). For our panel,  
662 with  $n=279$  genotypes and  $p=60k$  SNPs, this threshold is reached around  $k=30$ .

663 To circumvent the fact that the methods account for LD differently, we compared all  
664 methods in terms of QTLs, defined here as intervals around significant SNPs, instead of significant  
665 SNPs directly. But even here the fact that we used the genome-wide distribution of LD to define the  
666 extent of QTLs ignores local variations of LD along the genome. Adding haplotype-based methods  
667 to the comparison could provide complementary information (Lorenz *et al.*, 2010), but is beyond  
668 the scope of this work as it requires first to infer local haplotypes, a difficult endeavor in itself,  
669 especially for highly heterozygous individuals, and then to account for haplotype uncertainty when  
670 testing the null hypothesis of no association between the haplotype and the response.

671 We compared our QTLs only with those from the literature which passed a genome-wide  
672 significance threshold. When we deemed one of our QTL to be new, it may nevertheless have been  
673 found in a bi-parental cross at the chromosome-wide significance threshold. Furthermore, such a  
674 comparison could be achieved only for a very small subset of traits. Part of the reason why may be  
675 publication bias (Rothstein *et al.*, 2005): many traits were analyzed with the interval-mapping  
676 method but only those with at least one QTL were mentioned in publications. In addition, we were  
677 faced with the notorious difficulty to assess if the same trait acronym used in different articles  
678 indeed corresponded to the same biological trait. A wider usage of a trait ontology, such as the *Vitis*  
679 ontology, to harness QTL results across studies seems the way forward (Krajewski *et al.*, 2015).

680 When comparing our QTLs with genomic annotations, we did find hundreds of hits.  
681 Beyond those already known (e.g., on chr2 around the MYB genes for anthocyanin-related response  
682 variables, Matus *et al.*, 2008), we hope such a database will help in refining existing annotations  
683 and suggesting new ones, as aimed in the INTEGRAPE initiative (<http://www.integrape.eu>).  
684 Ultimately, this should help prioritizing candidate genes for follow-up studies.

## 685 **Genomic prediction, and the wider goal of understanding genetic architectures**

687 The accuracy of genomic prediction, when assessed by cross-validation within the panel, reached  
688 promising levels: the median Pearson correlation around 0.4 corresponds to a moderately linear  
689 relationship between predicted and empirical genotypic BLUPs. This is notably the case for traits  
690 displaying a high broad-sense heritability, but not always. Genomic prediction can hence be useful  
691 for traits hard to measure accurately. In parallel, the coefficient of determination remains  
692 substantially lower (around 0.17), indicating that the variation of predicted genotypic BLUPs only  
693 explains a small proportion of the variance in empirical genotypic BLUPs. Nevertheless, in

694 selection, one mostly cares in accurately predicting the ranks of candidate genotypes, and the  
695 median Spearman correlation around 0.4 is relevant in that case.

696 Cross-validation results are interesting *per se* as they provide an upper threshold on  
697 prediction accuracy. Yet, the ultimate goal lies in training a model on a panel to predict genotypic  
698 BLUPs in a segregation population. When genomic prediction for mean berry weight was  
699 performed on a progeny, *i.e.*, on genotypes not part of the panel, the accuracy was lower than the  
700 results obtained by within-panel cross-validation, yet they displayed the same trend in terms of  
701 methods. The fact that the ridge regression model (rrBLUP) performed better than the sparse  
702 regression model (varbvs) may be due to both the infinitesimal architecture of the trait as well as the  
703 lack of segregating QTLs for this trait in the progeny. This promising result now needs to be  
704 confirmed with other traits and other, more complex progenies in a future work, in the same spirit as  
705 what was done on other perennial fruit crops (Muranty *et al.*, 2015; Minamikawa *et al.*, 2017).  
706 Indeed, genomic prediction in perennial crops is known to be promising (e.g., Grattapaglia and  
707 Resende, 2011), “as long as models are used at the relevant selection age and within the breeding  
708 zone in which they were estimated” (Resende *et al.*, 2012).

709 Furthermore, this diverse panel of 279 *Vitis vinifera* L. could represent the main building  
710 block of an international consortium in construction gathering geneticists, physiologists,  
711 biochemists, modelers and breeders working on grapevine as discussed during the Grapevine  
712 Breeding and Genetics in 2018 in Bordeaux, France. For instance, to study genotype-environment  
713 interactions in the vineyard, several research groups pledged to plant the panel in two randomized  
714 blocks at their site. This will notably allow to study the genetic basis of various phenological traits  
715 on the same plant material in contrasted sites. Other research groups are invited to contact us for  
716 more details. In parallel, the panel will be studied for traits related to drought in more controlled  
717 environments, extending what was done on a bi-parental cross (Coupel-Ledru *et al.*, 2014, 2016).

718 Beyond the results on individual QTLs from GWAS and on overall accuracy from  
719 genomic prediction, our study also aimed at providing basic insights into the genetic architecture of  
720 various traits of interest for grapevine. In this goal, we initially used a Bayesian sparse linear mixed  
721 model, BSLMM (Zhou *et al.*, 2013), as it includes both the Bayesian variable selection regression  
722 and the ridge regression as special cases. However, likely due to the small size of our panel compare  
723 to the data sets analyzed in the original article, the parameter uncertainty was too high to be  
724 meaningfully interpreted (Flutre *et al.*, 2018). Nevertheless, we took advantage of the large number  
725 of diverse traits, all analyzed in the same way, to shed some light on the interplay between the  
726 accuracy with which phenotypic measurements translates into genotypic values, the number of  
727 QTLs that can be reliably detected, and the differentiated prediction accuracy depending on

728 assumptions about the underlying genetic architectures. In our analyzes, we focused on the part of  
729 genetic architectures restricted to the additive genetic variance because including dominance  
730 genetic variance led to convergence issues. But more generally, strong arguments exist in favor of  
731 focusing only on the additive part (Hill *et al.*, 2008). In this context, the key difference between  
732 genetic architectures lies between the infinitesimal and the sparse architectures, and has been amply  
733 studied, *e.g.*, Daetwyler *et al.* (2010) and Wimmer *et al.* (2013). However, these articles focused on  
734 simulations or only analyzed annual crops for a small number of traits.

735 Our contribution on this topic confirmed the importance of heritability to detect QTLs  
736 and predict accurately. Indeed, detecting very few (or even no) QTLs for a given trait for which  
737 there is substantial genetic variance, could be interpreted as an absence of QTL with a strong-  
738 enough effect to be significant, hence as an indication of the genetic architecture being  
739 infinitesimal. In contrast, detecting several QTLs could suggest a sparse architecture. Nevertheless,  
740 as always with real data compared to simulations, it can also mean that the empirical BLUPs of the  
741 genotypic values are too noisy versions of the true genotypic values, hence no reliable QTL can be  
742 significantly detected, whatever the genetic architecture. Coloring points as in Figure 5 with respect  
743 to broad-sense heritability highlighted the importance of this metric when interpreting the  
744 relationship between the other two (difference in prediction accuracy and number of reliable QTLs).  
745 As a practical consequence, for response variables with a low broad-sense heritability, it seems  
746 more judicious to use a model assuming an infinitesimal architecture.

747 In the case of traits with low heritability, our results were in agreement with Wimmer *et*  
748 *al.* (2013) to recommend using the ridge regression BLUP, even though the genetic architecture  
749 underlying such traits is not infinitesimal. But most importantly, in contrast to Wimmer *et al.*  
750 (2013), we found many traits for which a variable selection method did predict better than the ridge  
751 regression BLUP, even though our sample size remained very low compared to studies on farm  
752 animals and humans. This may be due to the fact that we studied a perennial crop in which linkage  
753 disequilibrium falls very quickly compared to the long-range LD in annual crops studied by  
754 Wimmer *et al.* (2013). In the end, for breeding purposes, it may be sufficient to use a robust method  
755 such as the ridge regression whatever the trait. However, in basic research, we recommend to  
756 compare at least two methods, one assuming the infinitesimal model and another assuming a sparse  
757 architecture, and to put the results in perspective using estimates of heritability.

758

759 **Acknowledgments**

760 For funding: GrapeReSeq (ANR, 2009-2011), DLVitis (ANR, 2010-2012), Innovine (KBBE, 2014-  
761 2015), “Créer les cépages de demain avec les outils d’aujourd’hui” (CASDAR, 2011-2013),  
762 FruitSelGen (INRA méta-programme Selgen, 2015-2016). For the phenotyping of organic acids:  
763 Valérie Miralles and Jean-François Ballester from AGAP-PPB. For the sequencing: Pierre Mournet  
764 from AGAP-GPTR, GenoToul. For the computing: Bertrand Pitollat and the South Green platform.  
765

766 **Author contribution**

767 PT, AD, JMB and LLC initiated the project. AD and JPP conceived the experimental design in the  
768 field. GB and YB installed and managed the field trial under the supervision of JPP and LLC. GB,  
769 YB, JPP, AD, LLC, RB, TL, JMB, VL, PT collected phenotypic data on clusters and berries in  
770 2010-2012. CR and LLC collected organic acid data from berries in 2011-2012. LLC, VC and JPP  
771 conceived the experimental design in 2014-2015. AF, GB, YB and LLC collected phenotyping data  
772 in 2014-2015 and extracted DNA samples for the first GBS phase. IB tested the presence of viruses.  
773 MR, GB, YB and LLC prepared samples before polyphenols,  $\beta$ -damascenone and pDMS extraction.  
774 VB collected  $\beta$ -damascenone and pDMS data. LLC and TF conceived the experimental design for  
775 the GBS. AL extracted DNA samples for the second GBS phase and made the libraries. TF wrote all  
776 the code and performed the analyzes. TF, AD and CR interpreted the results. TF drafted the  
777 manuscript. All authors contributed critical revision of the work and approved the manuscript.  
778



779 **References**

780

781 **Adam-Blondon A-F, Martínez-Zapater JM, Kole C (Eds.). 2011.** *Genetics, genomics and*  
782 *breeding of grapes.*

783 **Adam-Blondon A, Roux C, Claux D, Butterlin G, Merdinoglu D, This P. 2004.** Mapping 245  
784 SSR markers on the *Vitis vinifera* genome: a tool for grape genetics. *Theoretical and Applied*  
785 *Genetics* **109**: 1017–1027.

786 **Albrechtsen A, Nielsen FC, Nielsen R. 2010.** Ascertainment Biases in SNP Chips Affect Measures  
787 of Population Divergence. *Molecular Biology and Evolution* **27**: 2534–2547.

788 **Arlot S, Lerasle M. 2016.** Choice of V for V-fold Cross-validation in Least-squares Density  
789 Estimation. *J. Mach. Learn. Res.* **17**: 7256–7305.

790 **Astle W, Balding D. 2009.** Population structure and cryptic relatedness in genetic association  
791 studies. *Statistical Science* **24**: 451–471.

792 **Baey C. 2014.** Modélisation de la variabilité inter-individuelle dans les modèles de croissance de  
793 plantes et sélection de modèles pour la prévision.

794 **Barba P, Cadle-Davidson L, Harriman J, Glaubitz J, Brooks S, Hyma K, Reisch B. 2014.**  
795 Grapevine powdery mildew resistance and susceptibility loci identified on a high-resolution SNP  
796 map. *Theoretical and Applied Genetics* **127**: 73–84.

797 **Bates D, Mächler M, Bolker B, Walker S. 2015.** Fitting linear mixed-effects models using lme4.  
798 *Journal of Statistical Software* **67**.

799 **Battilana J, Costantini L, Emanuelli F, Sevini F, Segala C, Moser S, Velasco R, Versini G,**  
800 **Grando MS. 2009.** The 1-deoxy-d-xylulose 5-phosphate synthase gene co-localizes with a major  
801 QTL affecting monoterpene content in grapevine. *Theoretical and Applied Genetics* **118**: 653–669.

802 **Bigard A, Berhe DT, Maoddi E, Sire Y, Boursiquot J-M, Ojeda H, Péros J-P, Doligez A,**  
803 **Romieu C, Torregrosa L. 2018.** *Vitis vinifera* L. Fruit Diversity to Breed Varieties Anticipating  
804 Climate Changes. *Frontiers in Plant Science* **9**.

805 **Bonnafous F, Fievet G, Blanchet N, Boniface M-C, Carrère S, Gouzy J, Legrand L, Marage G,**  
806 **Bret-Mestries E, Munos S, et al. 2018.** Comparison of GWAS models to identify non-additive  
807 genetic control of flowering time in sunflower hybrids. *Theoretical and Applied Genetics* **131**: 319–  
808 332.

809 **Box G, Cox D. 1964.** An analysis of transformations. *Journal of the Royal Statistical Society.*  
810 *Series B (Methodological)* **26**: 211–252.

811 **Browning BL, Browning SR. 2009.** A unified approach to genotype imputation and haplotype-  
812 phase inference for large data sets of trios and unrelated individuals. *The American Journal of*  
813 *Human Genetics* **84**: 210–223.

814 **Burbidge JB, Magee L, Robb AL. 1988.** Alternative Transformations to Handle Extreme Values of  
815 the Dependent Variable. *Journal of the American Statistical Association* **83**: 123.



- 816 **de los Campos G, Hickey JM, Pong-Wong R, Daetwyler HD, Calus MPL. 2013.** Whole-  
817 Genome Regression and Prediction Methods Applied to Plant and Animal Breeding. *Genetics* **193**:  
818 327–345.
- 819 **Canaguier A, Grimplet J, Di Gaspero G, Scalabrin S, Duchêne E, Choisne N, Mohellibi N,**  
820 **Guichard C, Rombauts S, Le Clainche I, et al. 2017.** A new version of the grapevine reference  
821 genome assembly (12X.v2) and of its annotation (VCost.v3). *Genomics Data* **14**: 56–62.
- 822 **Carbonetto P, Stephens M. 2012.** Scalable variational inference for Bayesian variable selection in  
823 regression, and its accuracy in genetic association studies. *Bayesian Analysis* **7**: 73–108.
- 824 **Cardon LR, Bell JI. 2001.** Association study designs for complex diseases. *Nature Reviews*  
825 *Genetics* **2**: 91–99.
- 826 **Carpenter J, Bithell J. 2000.** Bootstrap confidence intervals: when, which, what? A practical guide  
827 for medical statisticians. *Statistics in Medicine* **19**: 1141–1164.
- 828 **Chen J, Chen Z. 2008.** Extended Bayesian information criteria for model selection with large  
829 model spaces. *Biometrika* **95**: 759–771.
- 830 **Clark MF, Adams AN. 1977.** Characteristics of the Microplate Method of Enzyme-Linked  
831 Immunosorbent Assay for the Detection of Plant Viruses. *Journal of General Virology* **34**: 475–483.
- 832 **Coupel-Ledru A, Lebon É, Christophe A, Doligez A, Cabrera-Bosquet L, Péchier P, Hamard**  
833 **P, This P, Simonneau T. 2014.** Genetic variation in a grapevine progeny (*Vitis vinifera* L. cvs  
834 Grenache×Syrah) reveals inconsistencies between maintenance of daytime leaf water potential and  
835 response of transpiration rate under drought. *Journal of Experimental Botany*: eru228.
- 836 **Coupel-Ledru A, Lebon E, Christophe A, Gallo A, Gago P, Pantin F, Doligez A, Simonneau T.**  
837 **2016.** Reduced nighttime transpiration is a relevant breeding target for high water-use efficiency in  
838 grapevine. *Proceedings of the National Academy of Sciences* **113**: 8963–8968.
- 839 **Daetwyler H, Pong-Wong R, Villanueva B, Woolliams J. 2010.** The Impact of Genetic  
840 Architecture on Genome-Wide Evaluation Methods. *Genetics* **185**: 1021–1031.
- 841 **Di Gaspero G, Cipriani G, Adam-Blondon A-F, Testolin R. 2007.** Linkage maps of grapevine  
842 displaying the chromosomal locations of 420 microsatellite markers and 82 markers for R-gene  
843 candidates. *Theoretical and Applied Genetics* **114**: 1249–1263.
- 844 **Doligez A, Bertrand Y, Farnos M, Grolier M, Romieu C, Esnault F, Dias S, Berger G, François**  
845 **P, Pons T, et al. 2013.** New stable QTLs for berry weight do not colocalize with QTLs for seed  
846 traits in cultivated grapevine (*Vitis vinifera* L.). *BMC Plant Biology* **13**: 1–16.
- 847 **Duchêne E. 2020.** Vitis INRAE ontology.  
848 <https://urgi.versailles.inra.fr/ephep/ephep/ontologyportal.do>
- 849 **Duchêne E, Butterlin G, Claudel P, Dumas V, Jaegli N, Merdinoglu D. 2009.** A grapevine (*Vitis*  
850 *vinifera* L.) deoxy-d-xylulose synthase gene collocates with a major quantitative trait loci for  
851 terpenol content. *Theoretical and Applied Genetics* **118**: 541–552.

- 852 **Elshire R, Glaubitz J, Sun Q, Poland J, Kawamoto K, Buckler E, Mitchell S. 2011.** A Robust,  
853 Simple Genotyping-by-Sequencing (GBS) Approach for High Diversity Species. *PLoS One* **6**:  
854 e19379.
- 855 **Endelman J. 2011.** Ridge regression and other kernels for genomic selection with R package  
856 rrBLUP. *The Plant Genome Journal* **4**: 250.
- 857 **Falush D, Stephens M, Pritchard J. 2003.** Inference of Population Structure Using Multilocus  
858 Genotype Data: Linked Loci and Correlated Allele Frequencies. *Genetics* **164**: 1567–1587.
- 859 **Fiorani F, Schurr U. 2013.** Future Scenarios for Plant Phenotyping. *Annual Review of Plant*  
860 *Biology* **64**: 267–291.
- 861 **Flutre T. 2018.** Genome-wide association study of a diverse grapevine panel to uncover the genetic  
862 architecture of numerous traits of interest.
- 863 **Fournier-Level A, Le Cunff L, Gomez C, Doligez A, Ageorges A, Roux C, Bertrand Y, Souquet**  
864 **J-M, Cheynier V, This P. 2009.** Quantitative genetic bases of anthocyanin variation in grape (*Vitis*  
865 *vinifera* L. ssp. *sativa*) berry: a quantitative trait locus to quantitative trait nucleotide integrated  
866 study. *Genetics* **183**: 1127–1139.
- 867 **Gardner M, Altman D. 1986.** Confidence intervals rather than P values: estimation rather than  
868 hypothesis testing. *Br Med J (Clin Res Ed)* **292**: 746–750.
- 869 **Gaudillère J-P, Van Leeuwen C, Trégoat O. 2001.** The assessment of vine water uptake  
870 conditions by <sup>13</sup>C/<sup>12</sup>C discrimination in grape sugar. *OENO One* **35**: 195.
- 871 **Génard M, Bertin N, Gautier H, Lescourret F, Quilot B. 2010.** Virtual profiling: a new way to  
872 analyse phenotypes: Virtual profiling to analyse phenotypes. *The Plant Journal* **62**: 344–355.
- 873 **Gianola D, Cecchinato A, Naya H, Schön C-C. 2018.** Prediction of Complex Traits: Robust  
874 Alternatives to Best Linear Unbiased Prediction. *Frontiers in Genetics* **9**.
- 875 **Goodman SN, Fanelli D, Ioannidis JPA. 2016.** What does research reproducibility mean? *Science*  
876 *Translational Medicine* **8**: 341ps12-341ps12.
- 877 **Grattapaglia D, Resende M. 2011.** Genomic selection in forest tree breeding. *Tree Genetics &*  
878 *Genomes* **7**: 241–255.
- 879 **Guo D-L, Zhao H-L, Li Q, Zhang G-H, Jiang J-F, Liu C-H, Yu Y-H. 2019.** Genome-wide  
880 association study of berry-related traits in grape [*Vitis vinifera* L.] based on genotyping-by-  
881 sequencing markers. *Horticulture Research* **6**.
- 882 **Gurka MJ, Edwards LJ, Muller KE, Kupper LL. 2006.** Extending the Box-Cox transformation  
883 to the linear mixed model. *Journal of the Royal Statistical Society: Series A (Statistics in Society)*  
884 **169**: 273–288.
- 885 **Habier D, Fernando R, Dekkers J. 2007.** The impact of genetic relationship information on  
886 genome-assisted breeding values. *Genetics* **177**: 2389–2397.
- 887 **Hill W, Goddard M, Visscher P. 2008.** Data and Theory Point to Mainly Additive Genetic  
888 Variance for Complex Traits. *PLoS Genetics* **4**: e1000008.

- 889 **Hoggart C, Whittaker J, De Iorio M, Balding D. 2008.** Simultaneous analysis of all SNPs in  
890 genome-wide and re-sequencing association studies. *PLoS Genetics* **4**: e1000130.
- 891 **Jacquin L, Cao T-V, Ahmadi N. 2016.** A unified and comprehensible view of parametric and  
892 kernel methods for genomic prediction with application to rice. *Frontiers in Genetics* **7**.
- 893 **Jung H, Winefield C, Bombarely A, Prentis P, Waterhouse P. 2019.** Tools and Strategies for  
894 Long-Read Sequencing and De Novo Assembly of Plant Genomes. *Trends in Plant Science* **24**:  
895 700–724.
- 896 **Kicherer A, Herzog K, Bendel N, Klück H-C, Backhaus A, Wieland M, Rose J, Klingbeil L,**  
897 **Läbe T, Hohl C, et al. 2017.** Phenoliner: A New Field Phenotyping Platform for Grapevine  
898 Research. *Sensors* **17**: 1625.
- 899 **Klein LL, Miller AJ, Ciotir C, Hyma K, Uribe-Convers S, Londo J. 2018.** High-throughput  
900 sequencing data clarify evolutionary relationships among North American *Vitis* species and improve  
901 identification in USDA *Vitis* germplasm collections. *American Journal of Botany* **105**: 215–226.
- 902 **Kotseridis Y, Baumes RL, Skouroumounis GK. 1999.** Quantitative determination of free and  
903 hydrolytically liberated  $\beta$ -damascenone in red grapes and wines using a stable isotope dilution  
904 assay. *Journal of Chromatography A* **849**: 245–254.
- 905 **Krajewski P, Chen D, Ćwiek H, van Dijk A, Fiorani F, Kersey P, Klukas C, Lange M,**  
906 **Markiewicz A, Nap J, et al. 2015.** Towards recommendations for metadata and data handling in  
907 plant phenotyping. *Journal of Experimental Botany* **66**: 5417–5427.
- 908 **Kruglyak L. 1999.** Prospects for whole-genome linkage disequilibrium mapping of common  
909 disease genes. *Nature Genetics* **22**: 139–144.
- 910 **Kuhn M. 2018.** *caret: Classification and Regression Training*.
- 911 **Kuznetsova A, Brockhoff PB, Christensen RHB. 2017.** lmerTest Package: Tests in Linear Mixed  
912 Effects Models. *Journal of Statistical Software* **82**.
- 913 **Laucou V, Launay A, Bacilieri R, Lacombe T, Adam-Blondon A-F, Bérard A, Chauveau A, de**  
914 **Andrés MT, Hausmann L, Ibáñez J, et al. 2018.** Extended diversity analysis of cultivated  
915 grapevine *Vitis vinifera* with 10K genome-wide SNPs (T-Y Chiang, Ed.). *PLOS ONE* **13**: e0192540.
- 916 **Lorenz AJ, Hamblin MT, Jannink J-L. 2010.** Performance of Single Nucleotide Polymorphisms  
917 versus Haplotypes for Genome-Wide Association Analysis in Barley (I Baxter, Ed.). *PLoS ONE* **5**:  
918 e14079.
- 919 **Marchini J, Howie B. 2010.** Genotype imputation for genome-wide association studies. *Nature*  
920 *Reviews Genetics* **11**: 499–511.
- 921 **Mardia KV, Kent JT, Bibby JM. 1979.** *Multivariate analysis*. London ; New York: Academic  
922 Press.
- 923 **Marguerit E, Boury C, Manicki A, Donnart M, Butterlin G, Némorin A, Wiedemann-**  
924 **Merdinoglu S, Merdinoglu D, Ollat N, Decroocq S. 2009.** Genetic dissection of sex determinism,

- 925 inflorescence morphology and downy mildew resistance in grapevine. *Theoretical and Applied*  
926 *Genetics* **118**: 1261–1278.
- 927 **Marrano A, Birolo G, Prazzoli ML, Lorenzi S, Valle G, Grando MS. 2017.** SNP-Discovery by  
928 RAD-Sequencing in a Germplasm Collection of Wild and Cultivated Grapevines (*V. vinifera* L.) (S  
929 Amancio, Ed.). *PLOS ONE* **12**: e0170655.
- 930 **Marroni F, Pinosio S, Morgante M. 2014.** Structural variation and genome complexity: is  
931 dispensable really dispensable? *Current Opinion in Plant Biology* **18**: 31–36.
- 932 **Matus J, Aquea F, Arce-Johnson P. 2008.** Analysis of the grape MYB R2R3 subfamily reveals  
933 expanded wine quality-related clades and conserved gene structure organization across *Vitis* and  
934 *Arabidopsis* genomes. *BMC Plant Biology* **8**: 83.
- 935 **McShane BB, Gal D. 2017.** Statistical Significance and the Dichotomization of Evidence. *Journal*  
936 *of the American Statistical Association* **112**: 885–895.
- 937 **Mejía N, Soto B, Guerrero M, Casanueva X, Houel C, de los Ángeles Miccono M, Ramos R,**  
938 **Le Cunff L, Boursiquot J-M, Hinrichsen P, et al. 2011.** Molecular, genetic and transcriptional  
939 evidence for a role of VvAGL11 in stenospermocarpic seedlessness in grapevine. *BMC Plant*  
940 *Biology* **11**: 57.
- 941 **Meuwissen T, Hayes B, Goddard M. 2001.** Prediction of total genetic value using genome-wide  
942 dense marker maps. *Genetics* **157**: 1819–1829.
- 943 **Migicovsky Z, Sawler J, Gardner KM, Aradhya MK, Prins BH, Schwaninger HR,**  
944 **Bustamante CD, Buckler ES, Zhong G-Y, Brown PJ, et al. 2017.** Patterns of genomic and  
945 phenomic diversity in wine and table grapes. *Horticulture Research* **4**: 17035.
- 946 **Minamikawa MF, Nonaka K, Kaminuma E, Kajiya-Kanegae H, Onogi A, Goto S, Yoshioka T,**  
947 **Imai A, Hamada H, Hayashi T, et al. 2017.** Genome-wide association study and genomic  
948 prediction in citrus: Potential of genomics-assisted breeding for fruit quality traits. *Scientific*  
949 *Reports* **7**.
- 950 **Möhring J, Piepho H-P. 2009.** Comparison of Weighting in Two-Stage Analysis of Plant Breeding  
951 Trials. *Crop Science* **49**: 1977.
- 952 **Molnar M, Ilie L. 2015.** Correcting Illumina data. *Briefings in Bioinformatics* **16**: 588–599.
- 953 **Muranty H, Troglio M, Sadok IB, Rifai MA, Auwerkerken A, Banchi E, Velasco R, Stevanato**  
954 **P, van de Weg WE, Di Guardo M, et al. 2015.** Accuracy and responses of genomic selection on  
955 key traits in apple breeding. *Horticulture Research* **2**.
- 956 **Myles S, Boyko A, Owens C, Brown P, Grassi F, Aradhya M, Prins B, Reynolds A, Chia J-M,**  
957 **Ware D, et al. 2011.** Genetic structure and domestication history of the grape. *Proceedings of the*  
958 *National Academy of Sciences* **108**: 3530–3535.
- 959 **Myles S, Peiffer J, Brown PJ, Ersoz ES, Zhang Z, Costich DE, Buckler ES. 2009.** Association  
960 Mapping: Critical Considerations Shift from Genotyping to Experimental Design. *The Plant Cell*  
961 **21**: 2194–2202.

- 962 **Nanson A. 1970.** L'héritabilité et le gain d'origine génétique dans quelques types d'expériences.  
963 *Silvae Genetica* **19**: 113–121.
- 964 **Negi SS, Olmo HP. 1966.** Sex conversion in a male *Vitis vinifera* L. by a kinin. *Science* **152**: 1624–  
965 1624.
- 966 **Nicolas S, Péros J-P, Lacombe T, Launay A, Le Paslier M-C, Bérard A, Mangin B, Valière S,**  
967 **Martins F, Le Cunff L, et al. 2016.** Genetic diversity, linkage disequilibrium and power of a large  
968 grapevine (*Vitis vinifera* L) diversity panel newly designed for association studies. *BMC Plant*  
969 *Biology* **16**.
- 970 **Oakey H, Verbyla A, Pitchford W, Cullis B, Kuchel H. 2006.** Joint modeling of additive and non-  
971 additive genetic line effects in single field trials. *Theoretical and Applied Genetics* **113**: 809–819.
- 972 **Pallas B, Loi C, Christophe A, Cournède P-H, Lecoeur J. 2009.** A Stochastic Growth Model of  
973 Grapevine with Full Interaction Between Environment, Trophic Competition and Plant  
974 Development. In: IEEE, 95–102.
- 975 **Pérez P, Gustavo de los Campos. 2014.** Genome-Wide Regression and Prediction with the BGLR  
976 Statistical Package. *Genetics* **198**: 483–495.
- 977 **Picq S, Santoni S, Lacombe T, Latreille M, Weber A, Ardisson M, Ivorra S, Maghradze D,**  
978 **Arroyo-Garcia R, Chatelet P, et al. 2014.** A small XY chromosomal region explains sex  
979 determination in wild dioecious *V. vinifera* and the reversal to hermaphroditism in domesticated  
980 grapevines. *BMC Plant Biology* **14**.
- 981 **Pinasseau L, Vallverdú-Queralt A, Verbaere A, Roques M, Meudec E, Le Cunff L, Péros J-P,**  
982 **Ageorges A, Sommerer N, Boulet J-C, et al. 2017a.** Cultivar Diversity of Grape Skin Polyphenol  
983 Composition and Changes in Response to Drought Investigated by LC-MS Based Metabolomics.  
984 *Frontiers in Plant Science* **8**.
- 985 **Pinasseau L, Verbaere A, Roques M, Meudec E, Vallverdu-Queralt A, Ollier L, Marlin T,**  
986 **Guiraud J-L, Berger G, Bertrand Y, et al. 2017b.** Innovine WP3: 105 phenolic compound  
987 quantification of 2014 and 2015 mature grape berries from a core-collection of 279 irrigated and  
988 non-irrigated *Vitis vinifera* cultivars.
- 989 **Piñeiro G, Perelman S, Guerschman JP, Paruelo JM. 2008.** How to evaluate models: Observed  
990 vs. predicted or predicted vs. observed? *Ecological Modelling* **216**: 316–322.
- 991 **Pritchard J, Stephens M, Donnelly P. 2000.** Inference of population structure using multilocus  
992 genotype data. *Genetics* **155**: 945–959.
- 993 **Resende MFR, Muñoz P, Acosta JJ, Peter GF, Davis JM, Grattapaglia D, Resende MDV, Kirst**  
994 **M. 2012.** Accelerating the domestication of trees using genomic selection: accuracy of prediction  
995 models across ages and environments. *New Phytologist* **193**: 617–624.
- 996 **Rex F, Fechter I, Hausmann L, Töpfer R. 2014.** QTL mapping of black rot (*Guignardia bidwellii*)  
997 resistance in the grapevine rootstock 'Börner' (*V. riparia* Gm183 × *V. cinerea* Arnold). *Theoretical*  
998 *and Applied Genetics* **127**: 1667–1677.



- 999 **Reynolds D, Baret F, Welcker C, Bostrom A, Ball J, Cellini F, Lorence A, Chawade A, Khafif**  
1000 **M, Noshita K, et al. 2019.** What is cost-efficient phenotyping? Optimizing costs for different  
1001 scenarios. *Plant Science* **282**: 14–22.
- 1002 **Rienth M, Torregrosa L, Sarah G, Ardisson M, Brillouet J-M, Romieu C. 2016.** Temperature  
1003 desynchronizes sugar and organic acid metabolism in ripening grapevine fruits and remodels their  
1004 transcriptome. *BMC Plant Biology* **16**.
- 1005 **Rockman MV. 2012.** The QTN program and the alleles that matter for evolution: all that’s gold  
1006 does not glitter. *Evolution* **66**: 1–17.
- 1007 **Rothstein HR, Sutton AJ, Borenstein M (Eds.). 2005.** *Publication Bias in Meta-Analysis:*  
1008 *Prevention, Assessment and Adjustments.* Chichester, UK: John Wiley & Sons, Ltd.
- 1009 **Schweiger R, Kaufman S, Laaksonen R, Kleber ME, März W, Eskin E, Rosset S, Halperin E.**  
1010 **2016.** Fast and accurate construction of confidence intervals for heritability. *The American Journal*  
1011 *of Human Genetics* **98**: 1181–1192.
- 1012 **Segura V, Vilhjalmsen B, Platt A, Korte A, Seren U, Long Q, Nordborg M. 2012.** An efficient  
1013 multi-locus mixed-model approach for genome-wide association studies in structured populations.  
1014 *Nature Genetics* **44**: 825–830.
- 1015 **Segurel MA, Razungles AJ, Riou C, Trigueiro MGL, Baumes RL. 2005.** Ability of Possible  
1016 DMS Precursors To Release DMS during Wine Aging and in the Conditions of Heat-Alkaline  
1017 Treatment. *Journal of Agricultural and Food Chemistry* **53**: 2637–2645.
- 1018 **Shahood R. 2017.** La baie au sein d’une vendange asynchrone : Un nouveau paradigme vers  
1019 l’interprétation quantitative des flux de sucres et acides en tant qu’osmotocums et substrat  
1020 respiratoires majeurs lors du développement bimodal du raisin.
- 1021 **Sievanen R, Godin C, DeJong TM, Nikinmaa E. 2014.** Functional-structural plant models: a  
1022 growing paradigm for plant studies. *Annals of Botany* **114**: 599–603.
- 1023 **Swarts K, Li H, Alberto Romero Navarro, An D, Romay M, Hearne S, Acharya C, Glaubitz J,**  
1024 **Mitchell S, Elshire R, et al. 2014.** Novel Methods to Optimize Genotypic Imputation for Low-  
1025 Coverage, Next-Generation Sequence Data in Crop Plants. *The Plant Genome* **7**.
- 1026 **VanRaden P. 2008.** Efficient methods to compute genomic predictions. *Journal of Dairy Science*  
1027 **91**: 4414–4423.
- 1028 **Verzelen N. 2012.** Minimax risks for sparse regressions: Ultra-high dimensional phenomenons.  
1029 *Electronic Journal of Statistics* **6**: 38–90.
- 1030 **Vezzulli S, Zulini L, Stefanini M. 2019.** Genetics-assisted breeding for downy/powdery mildew  
1031 and phylloxera resistance at fem (J-M Aurand, Ed.). *BIO Web of Conferences* **12**: 01020.
- 1032 **Vitezica Z, Varona L, Legarra A. 2013.** On the additive and dominant variance and covariance of  
1033 individuals within the genomic selection scope. *Genetics* **195**: 1223–1230.
- 1034 **Wang X, Yang Z, Xu C. 2015.** A comparison of genomic selection methods for breeding value  
1035 prediction. *Science Bulletin* **60**: 925–935.

- 1036 **Wimmer V, Lehermeier C, Albrecht T, Auinger H-J, Wang Y, Schon C-C. 2013.** Genome-Wide  
1037 Prediction of Traits with Different Genetic Architecture Through Efficient Variable Selection.  
1038 *Genetics* **195**: 573–587.
- 1039 **Wolkovich EM, García de Cortázar-Atauri I, Morales-Castilla I, Nicholas KA, Lacombe T.**  
1040 **2018.** From Pinot to Xinomavro in the world’s future wine-growing regions. *Nature Climate*  
1041 *Change* **8**: 29–37.
- 1042 **Xu S. 2003a.** Estimating polygenic effects using markers of the entire genome. *Genetics* **163**: 789–  
1043 801.
- 1044 **Xu S. 2003b.** Theoretical basis of the Beavis effect. *Genetics* **165**: 2259–2268.
- 1045 **Yang J, Benyamin B, McEvoy B, Gordon S, Henders A, Nyholt D, Madden P, Heath A, Martin**  
1046 **N, Montgomery G, et al. 2010.** Common SNPs explain a large proportion of the heritability for  
1047 human height. *Nature genetics* **42**: 565–569.
- 1048 **Yang X, Guo Y, Zhu J, Niu Z, Shi G, Liu Z, Li K, Guo X. 2017.** Genetic Diversity and  
1049 Association Study of Aromatics in Grapevine. *Journal of the American Society for Horticultural*  
1050 *Science* **142**: 225–231.
- 1051 **Zarouri B. 2016.** Association study of phenology, yield and quality related traits in table grapes  
1052 using SSR and SNP markers.
- 1053 **Zhang H, Fan X, Zhang Y, Jiang J, Liu C. 2017.** Identification of favorable SNP alleles and  
1054 candidate genes for seedlessness in *Vitis vinifera* L. using genome-wide association mapping.  
1055 *Euphytica* **213**.
- 1056 **Zhang Y-M, Jia Z, Dunwell JM. 2019.** Editorial: The Applications of New Multi-Locus GWAS  
1057 Methodologies in the Genetic Dissection of Complex Traits. *Frontiers in Plant Science* **10**: 100.
- 1058 **Zhou X, Carbonetto P, Stephens M. 2013.** Polygenic modeling with Bayesian sparse linear mixed  
1059 models. *PLoS Genetics* **9**: e1003264.
- 1060 **Zhou X, Stephens M. 2012.** Genome-wide efficient mixed-model analysis for association studies.  
1061 *Nature Genetics* **44**: 821–824.
- 1062



1063 **Supporting information**

1064

1065 **Fig. S1** Layout of the field trial

1066

1067 **Fig. S2** Distribution of raw phenotypic data per response variable, block and year

1068

1069 **Fig. S3** Variogram of controls' residuals per response variable and year

1070

1071 **Fig. S4** Principal component analysis with 8840 microarray-only SNPs and assignments from  
1072 Nicolas *et al.* (2016)

1073

1074 **Fig. S5** Distribution of minor allele frequencies of SNPs per SNP set

1075

1076 **Fig. S6** SNP density per chromosome per SNP set

1077

1078 **Fig. S7** Additive and dominance genetic relationships per SNP set

1079

1080 **Fig. S8** Physical distance between SNP pairs plotted against their linkage disequilibrium value per  
1081 SNP set

1082

1083 **Fig. S9** Numbers of QTLs found by one, two, or the three statistical methods

1084

1085 **Fig. S10** Numbers of response variables with at least one QTL found by one, two, or the three  
1086 statistical methods

1087

1088 **Fig. S11** Genomic distribution of QTLs per statistical method

1089

1090 **Fig. S12** Genomic distribution of reliable QTLs, found with at least two statistical methods

1091

1092 **Fig. S13** Distributions of genotypic values per genotypic class for one significant SNP per QTL, for  
1093 all reliable QTLs

1094

1095 **Fig. S14** Spearman correlation coefficient (from cross-validation) per response variable plotted  
1096 against estimated broad-sense heritabilities, per method and SNP set

1097

1098 **Fig. S15** Pearson correlation coefficients between the empirical BLUPs of genotypic values for all  
1099 pairs of response variables

1100

1101

1102 **Table S1** Barcodes used to multiplex samples before sequencing

1103

1104 **Table S2** List of traits along with the fixed and random effects of the final linear mixed model  
1105 selected for each response variable, as well as the estimates and confidence intervals of broad-sense  
1106 heritability and coefficient of genetic variation

1107

1108 **Table S3** List of cultivars with genetic assignment modified between SSRs and microarray SNPs

1109

1110 **Table S4** Estimates and confidence intervals of narrow-sense heritability (as the proportion of  
1111 variance in genotypic BLUPs explained by SNPs,  $PVE_{SNPs}$ ) per response variable, by maximum

1112 likelihood (ML) and restricted maximum likelihood (ReML), using additive-only and  
1113 additive+dominance variance components  
1114

1115 **Table S5** List of significant SNPs per SNP set and statistical method  
1116

1117 **Table S6** List of significant QTLs per SNP set and statistical method  
1118

1119 **Table S7** List of significant QTLs merged per response variable over statistical methods and SNP  
1120 sets, along with their reliability  
1121

1122 **Table S8** Classification of the traits according to the *Vitis* ontology  
1123

1124 **Table S9** List of reliable QTLs merged over response variables  
1125

1126 **Table S10** List of positional candidate gene models for the reliable QTLs merged over response  
1127 variables  
1128

1129 **Table S11** Annotations of positional candidate genes for the reliable QTLs merged over response  
1130 variables  
1131

1132 **Table S12** Average performance metrics from the repeated K-fold cross-validation performed on all  
1133 response variables per SNP set and statistical method  
1134

1135 **Table S13** Broad-sense heritability, number of reliable QTLs and difference between averaged  
1136 Spearman correlations of varbvs and rrBLUP from crossvalidation per response variable  
1137

1138 **Table S14** Matrix of Pearson correlation coefficients between the empirical BLUPs of genotypic  
1139 values for all pairs of response variables  
1140
